# Supplementary material
Source: PubMed Central journal article supplement (PMC7758814)
Supplement: NIHMS1644010-supplement-combined_figures.pdf [file NIHMS1644010-supplement-combined_figures.pdf]

Fig. 1  
Sriram et al.

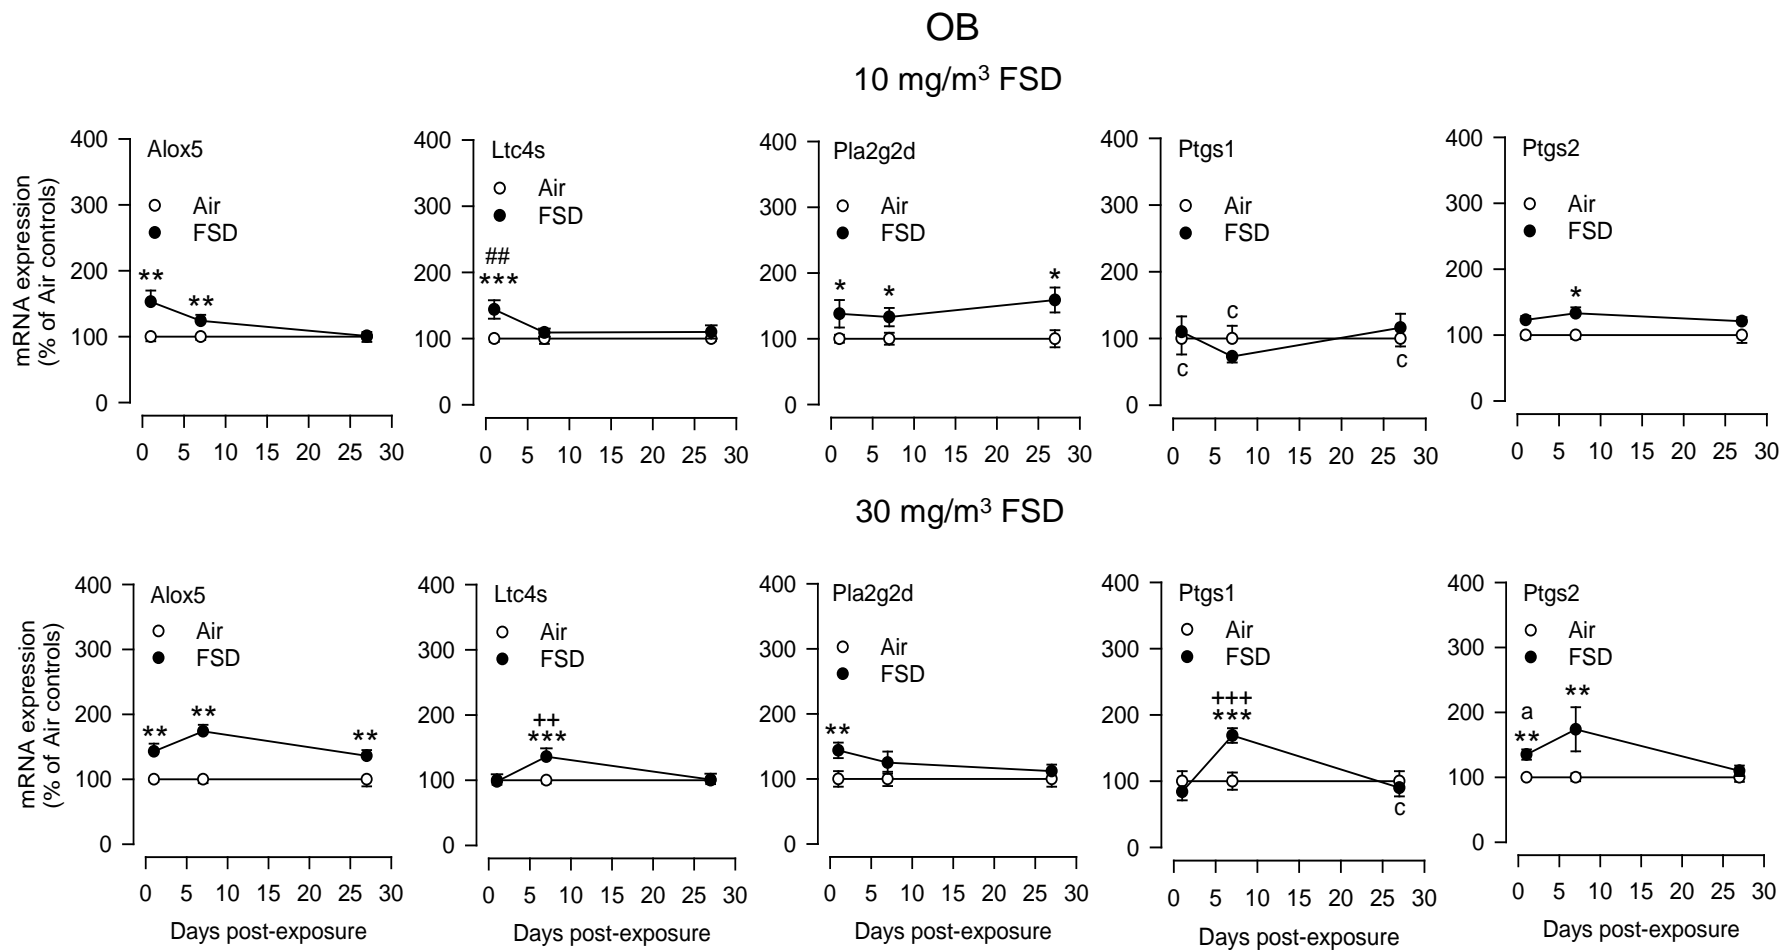

Fig. 2  
Sriram et al.

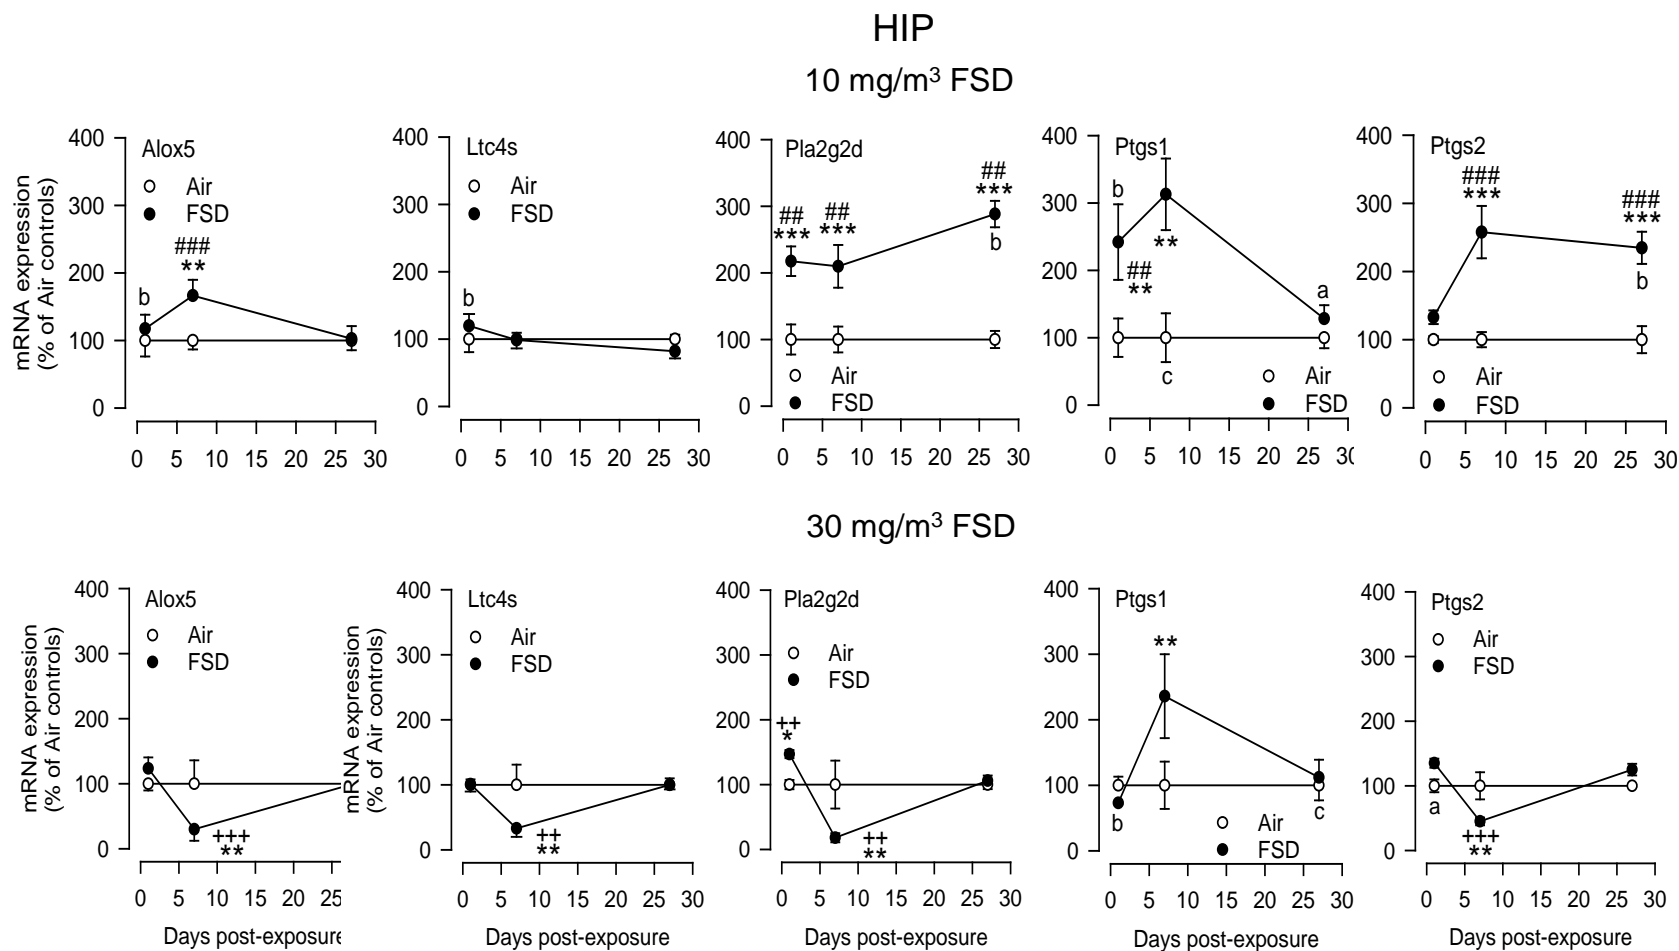

Fig. 3  
Sriram et al.

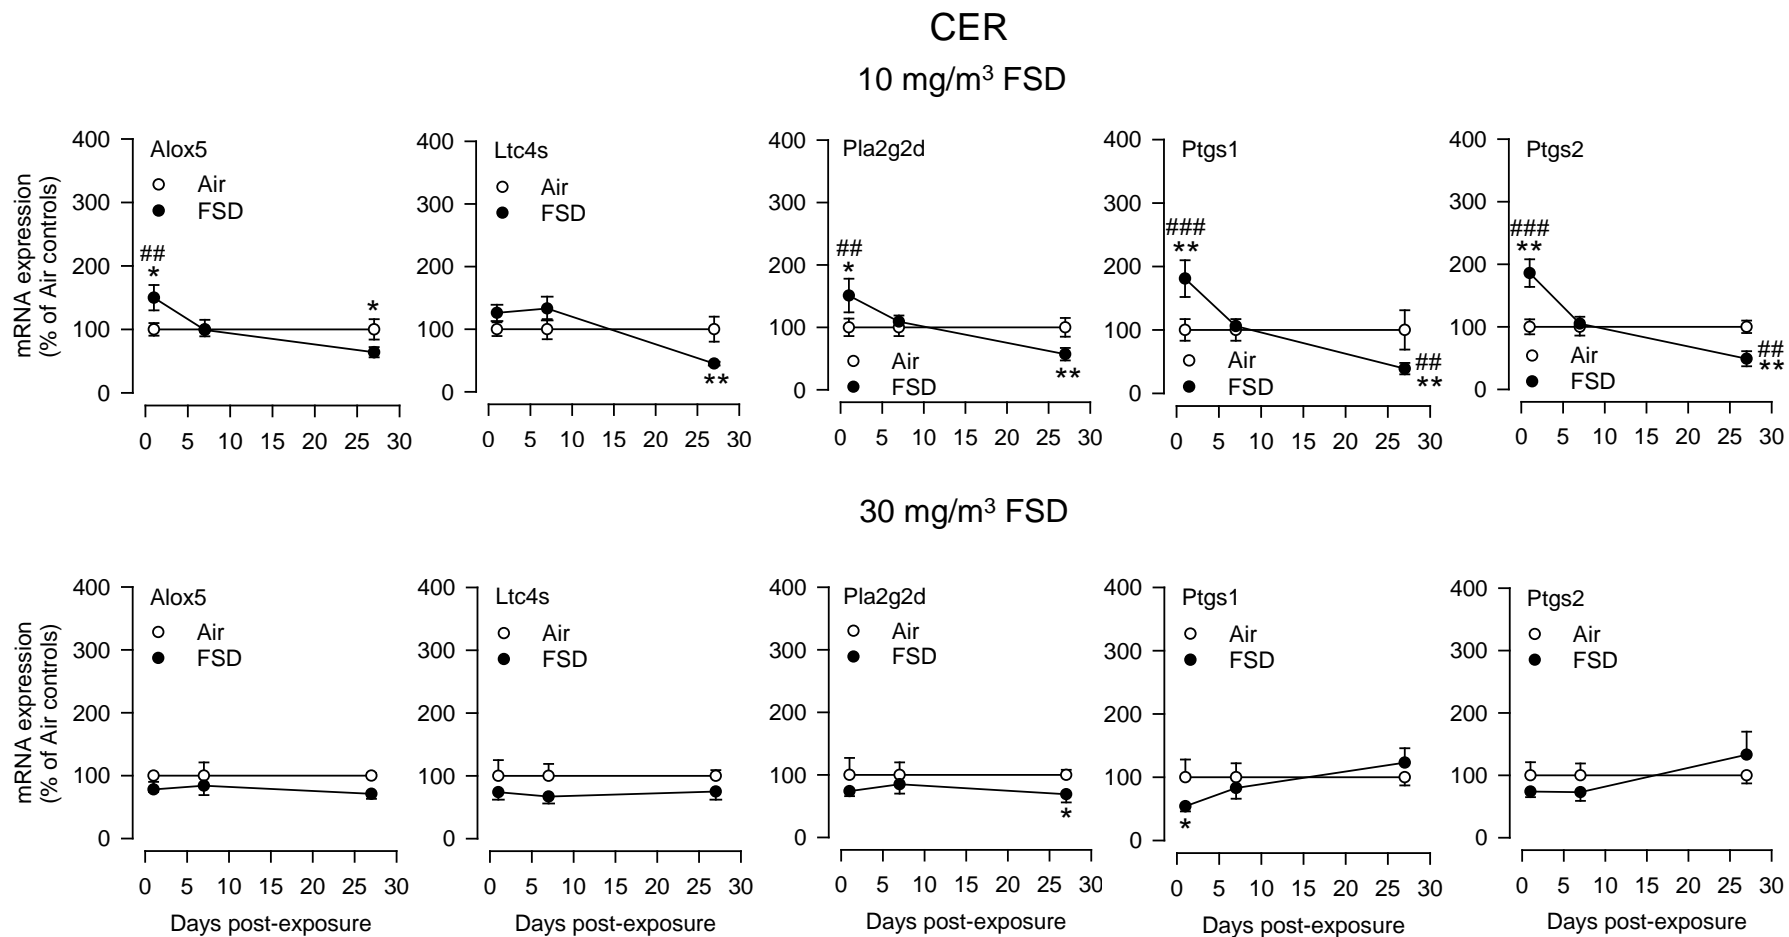



Fig. 5  
Sriram et al.

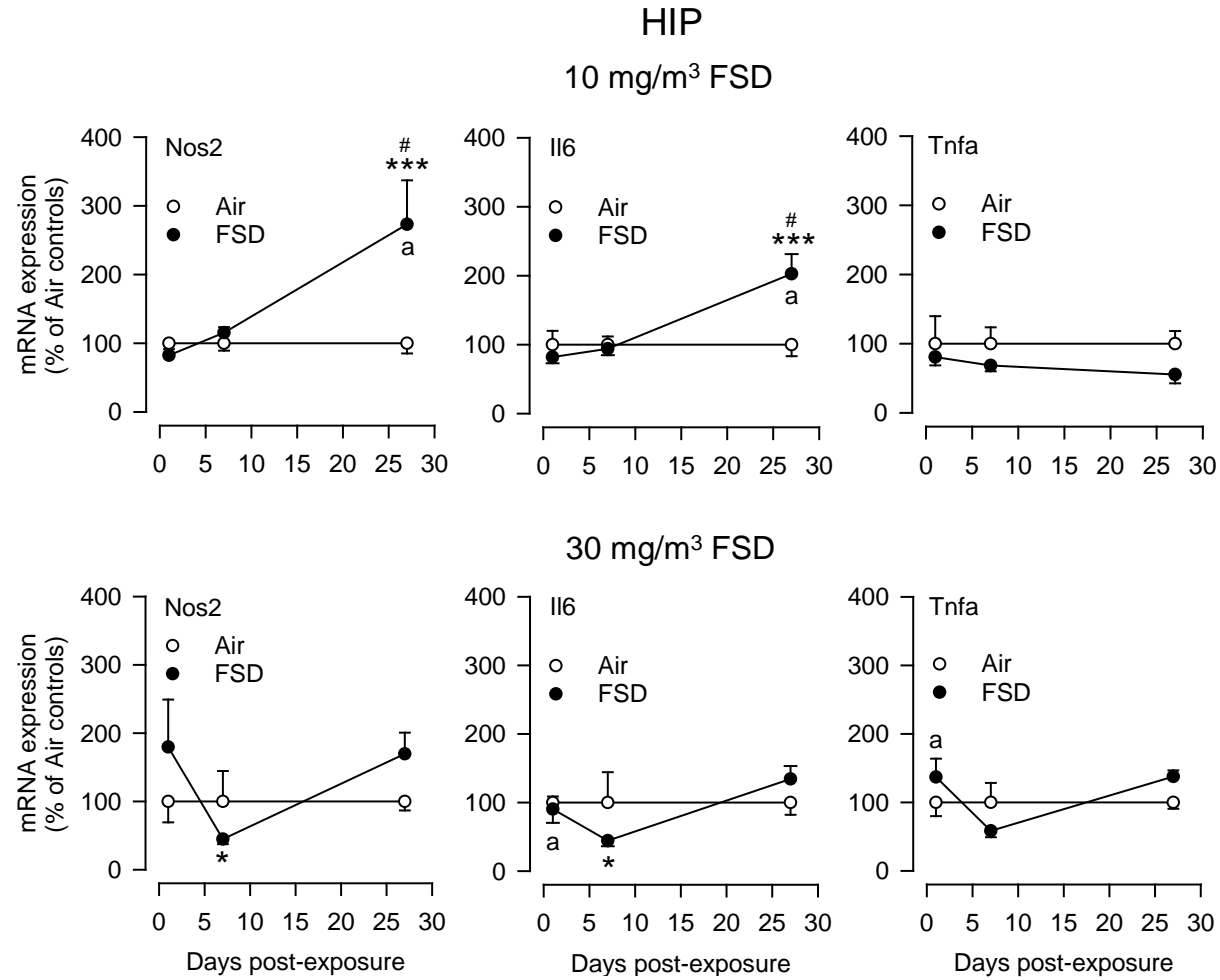

Fig. 6  
Sriram et al.

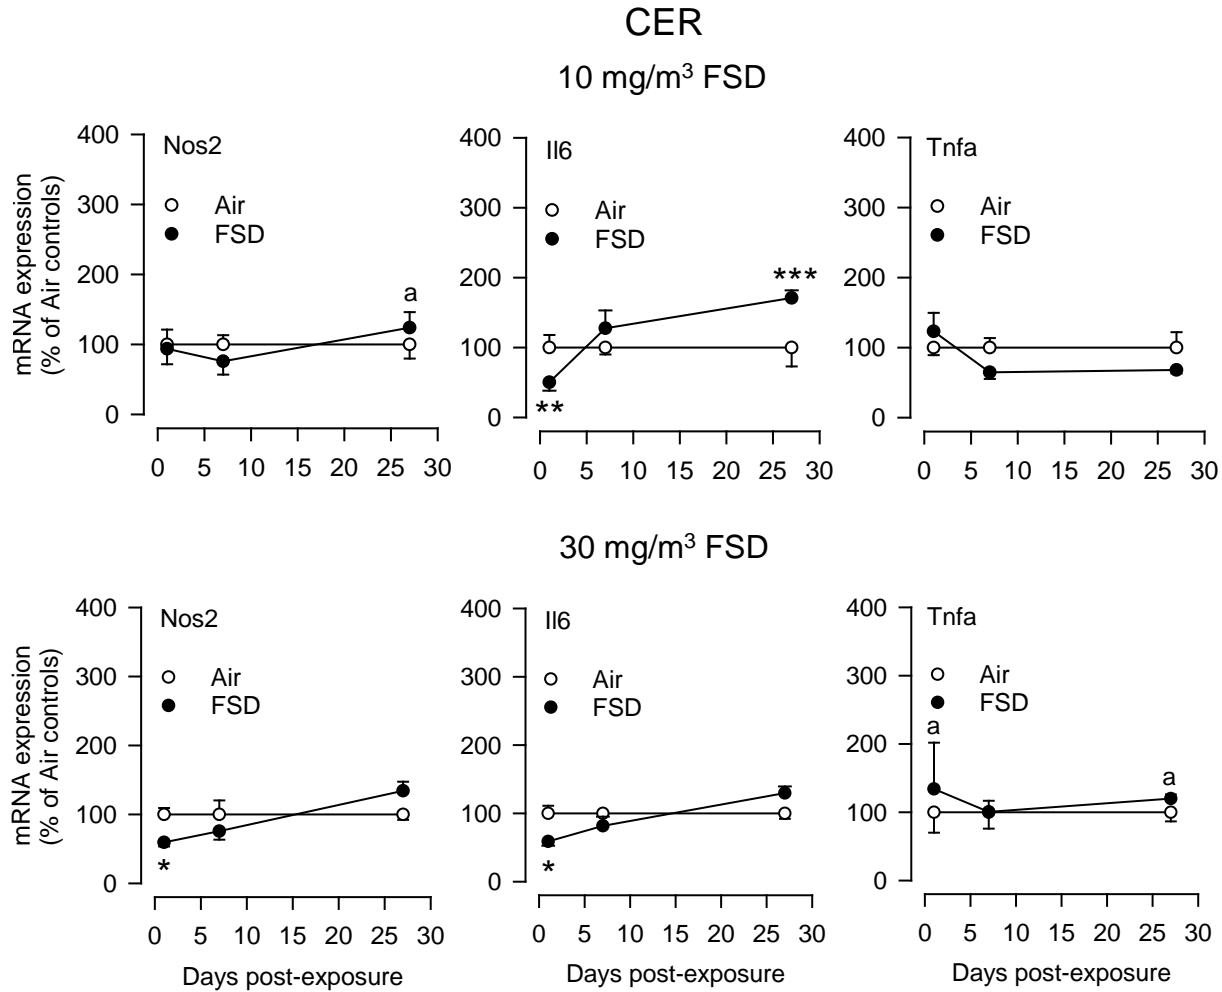

Fig. 7  
Sriram et al.

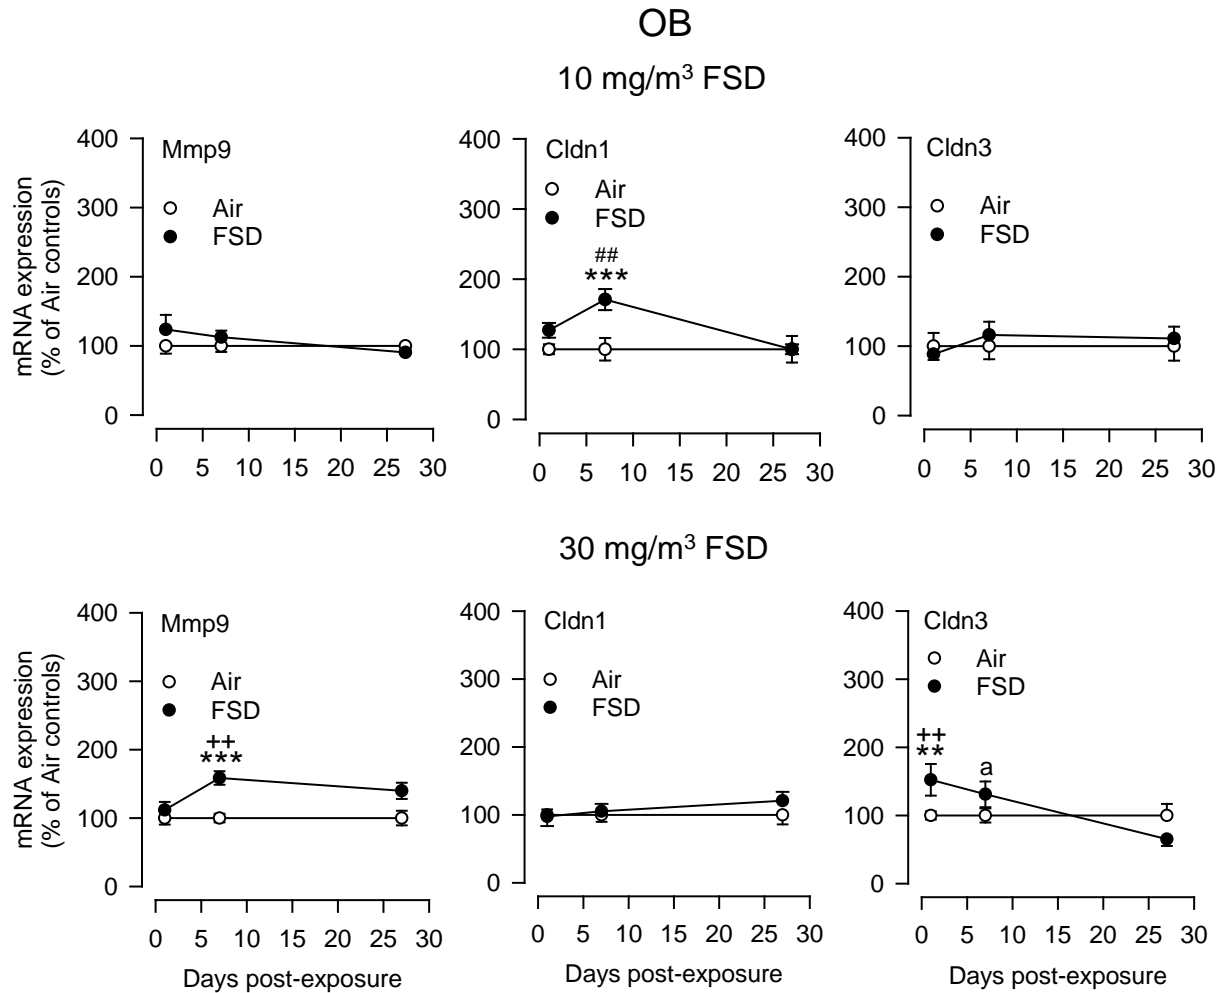

Fig. 8  
Sriram et al.

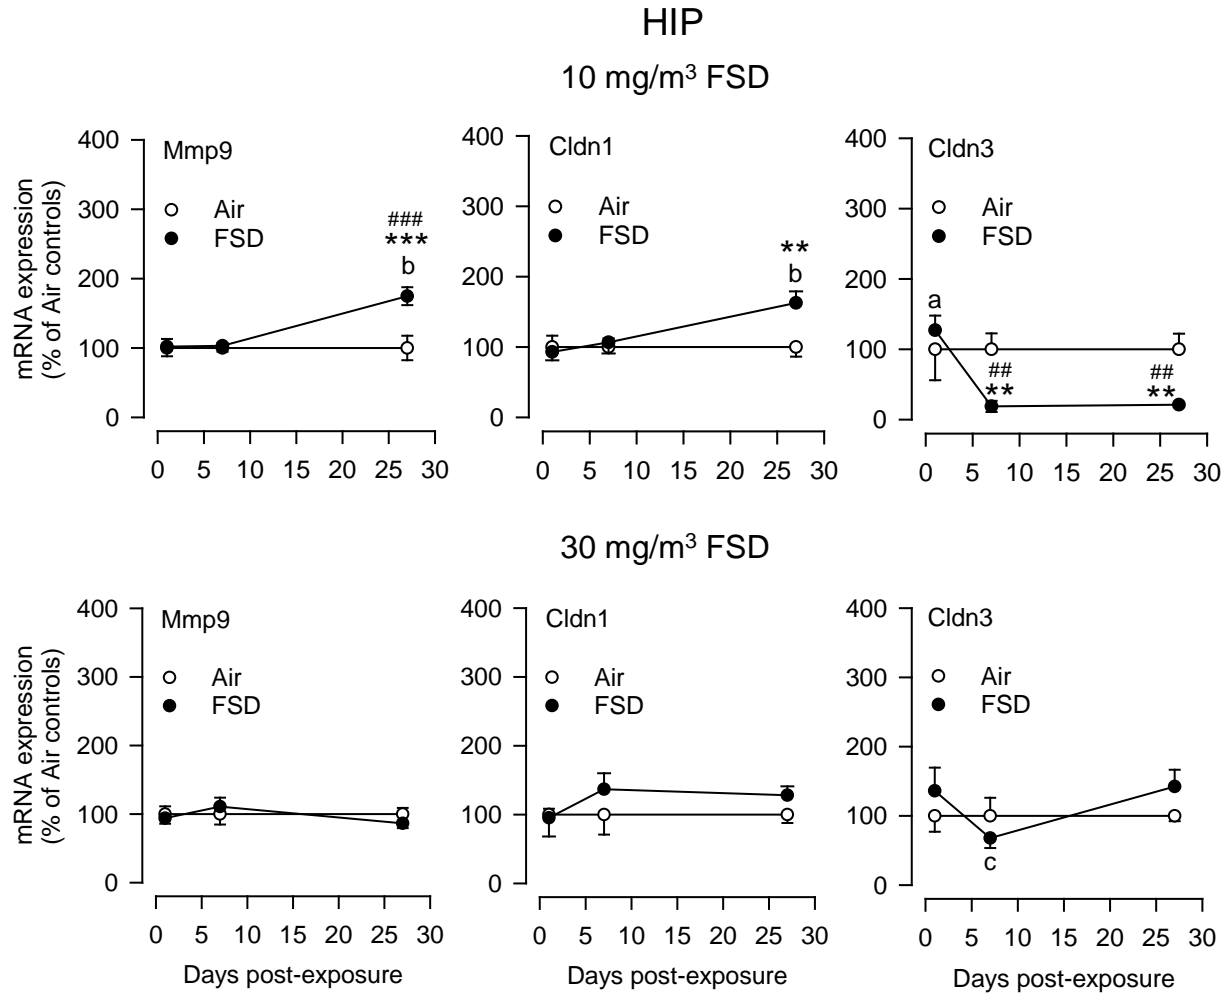



Fig. 9  
Sriram et al.

CER

10 mg/m<sup>3</sup> FSD

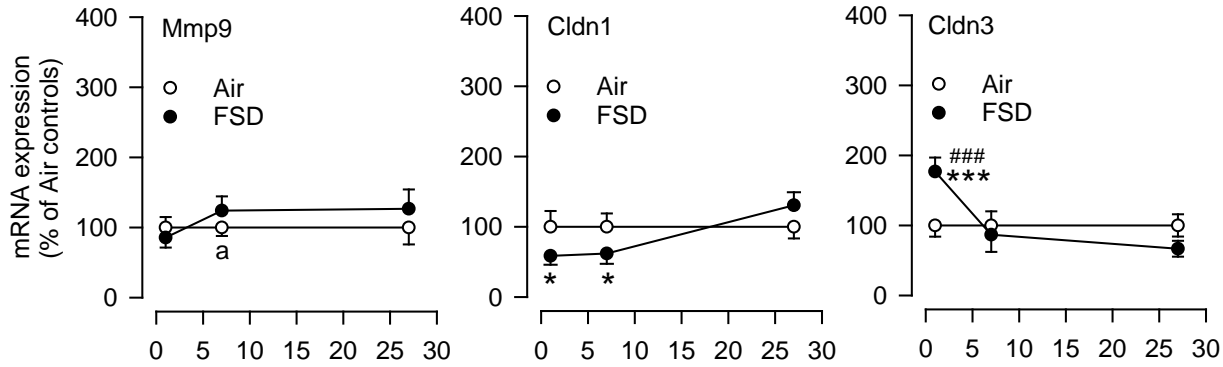

30 mg/m<sup>3</sup> FSD

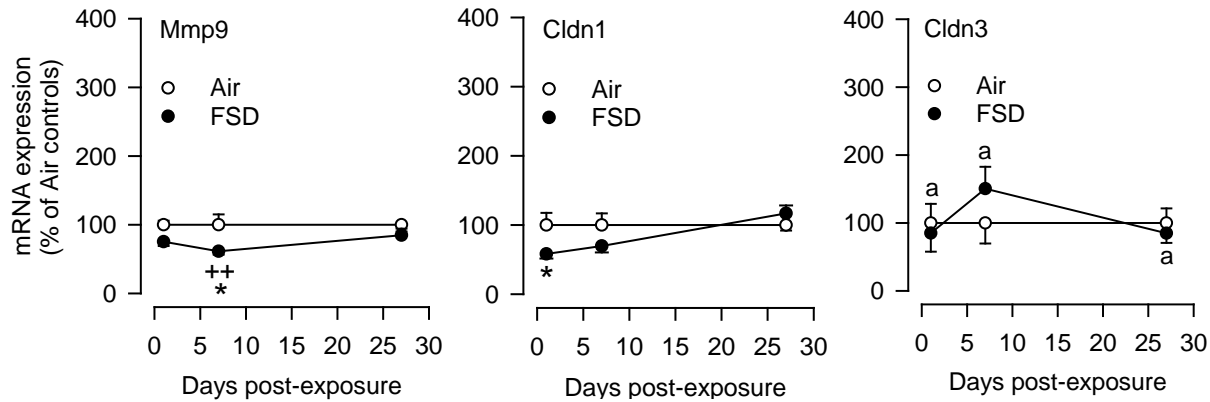

Fig. 10  
Sriram et al.

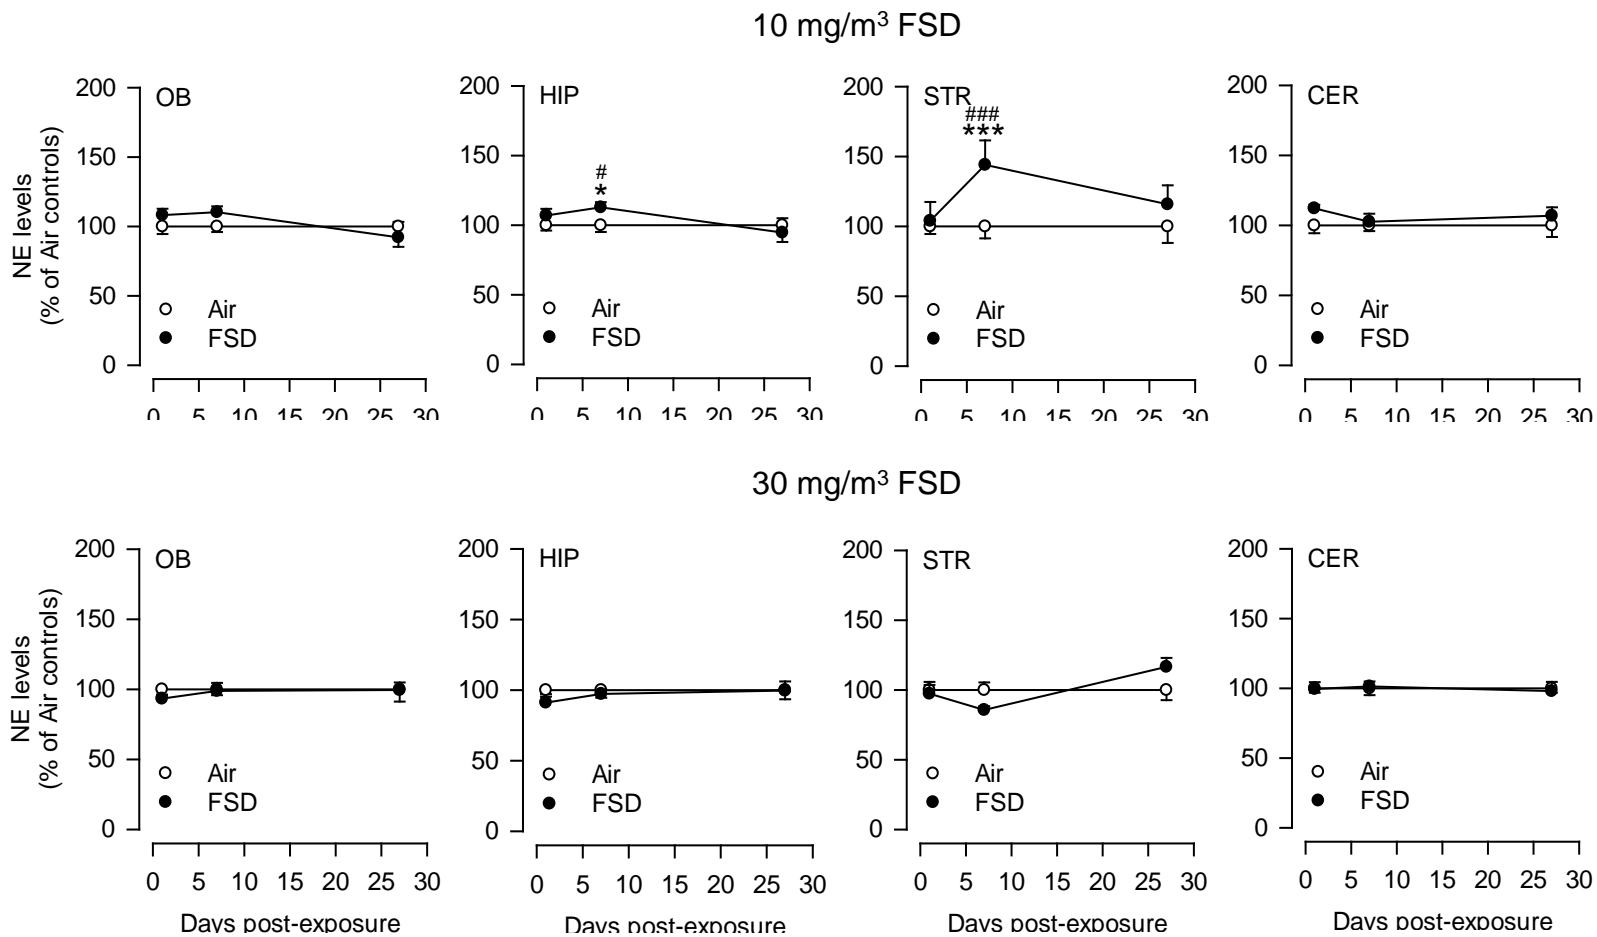

Fig. 11  
Sriram et al.

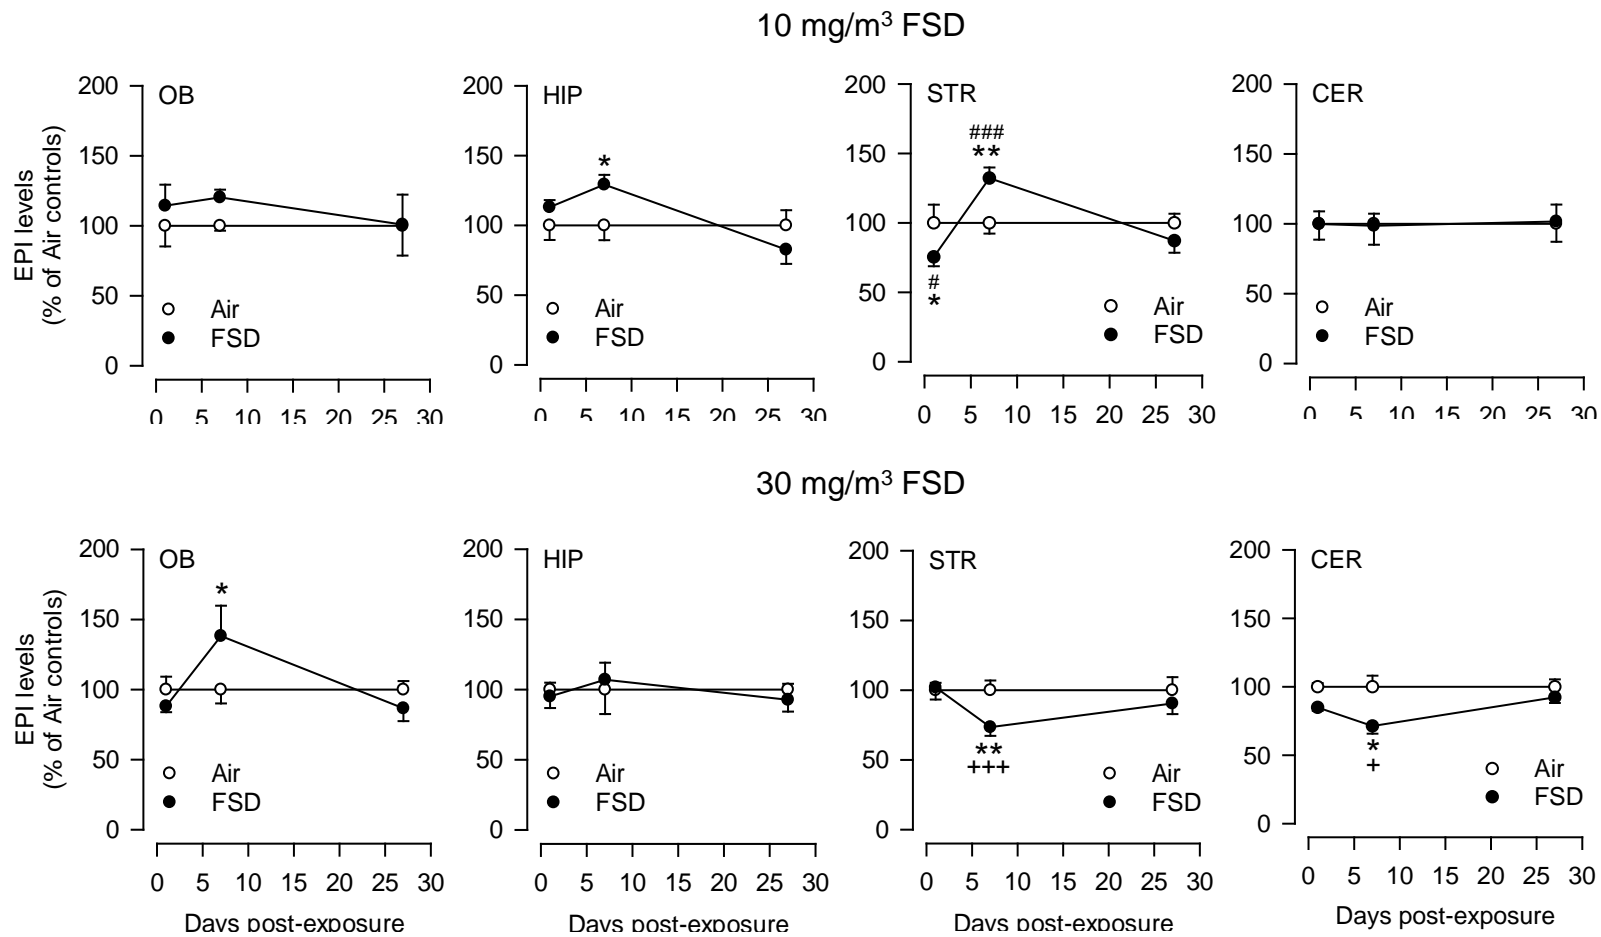



Fig. 13  
Sriram et al.

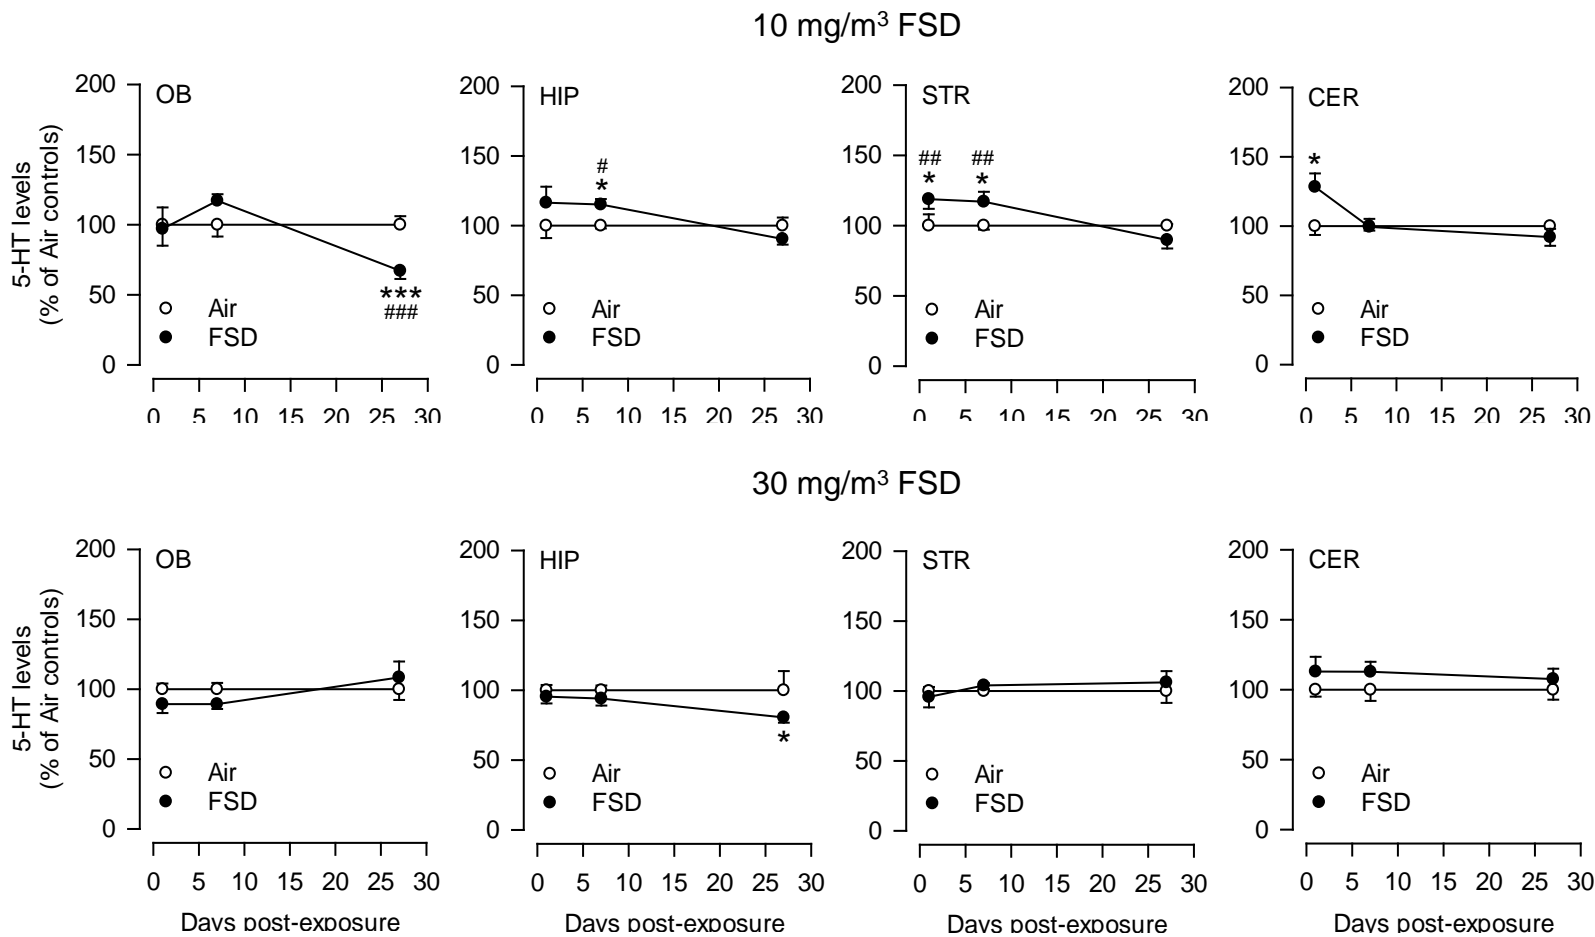

Fig. 14  
Sriram et al.

10 mg/m<sup>3</sup> FSD

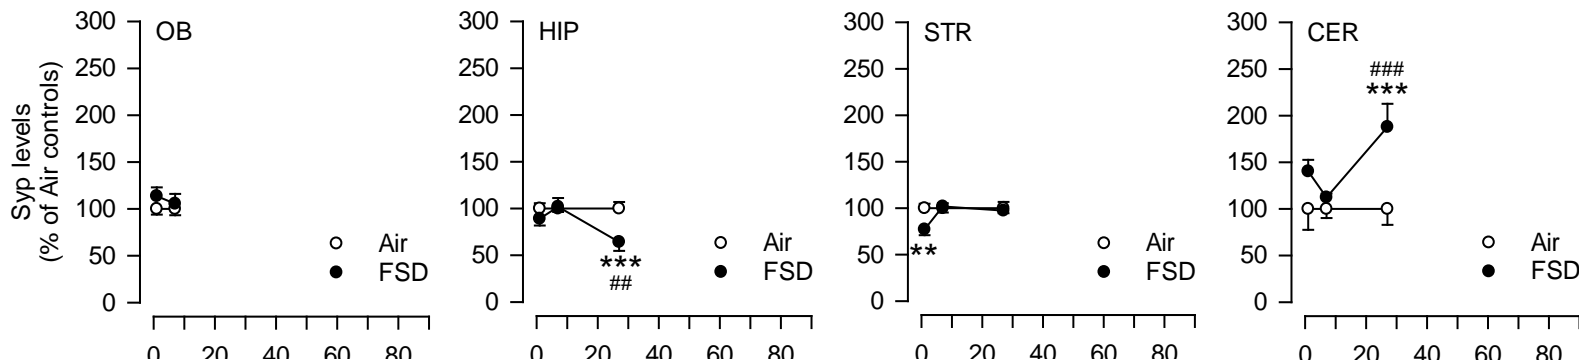

30 mg/m<sup>3</sup> FSD

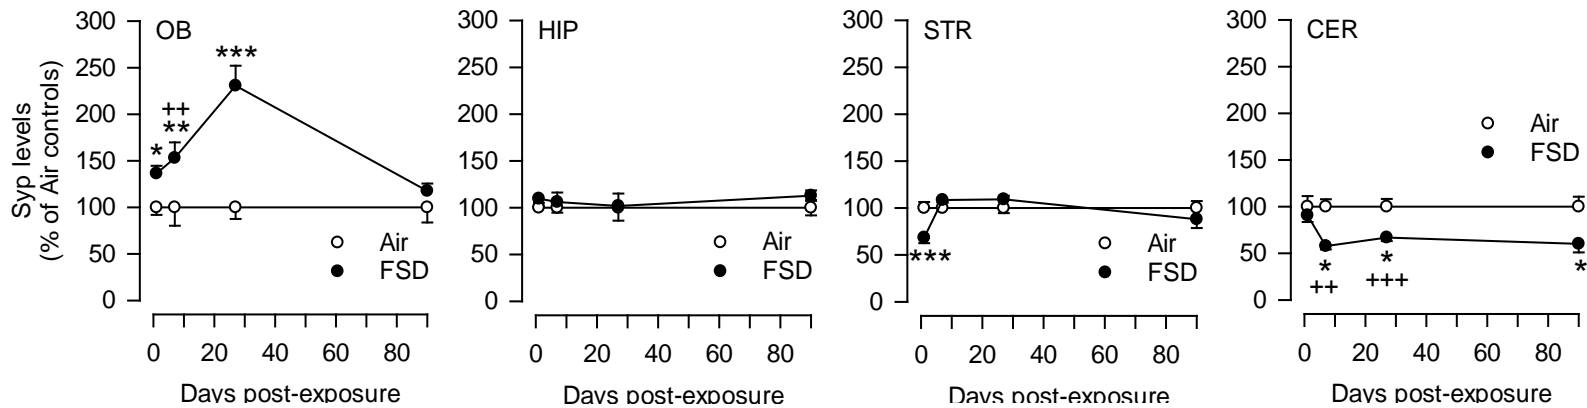

Fig. 15  
Sriram et al.

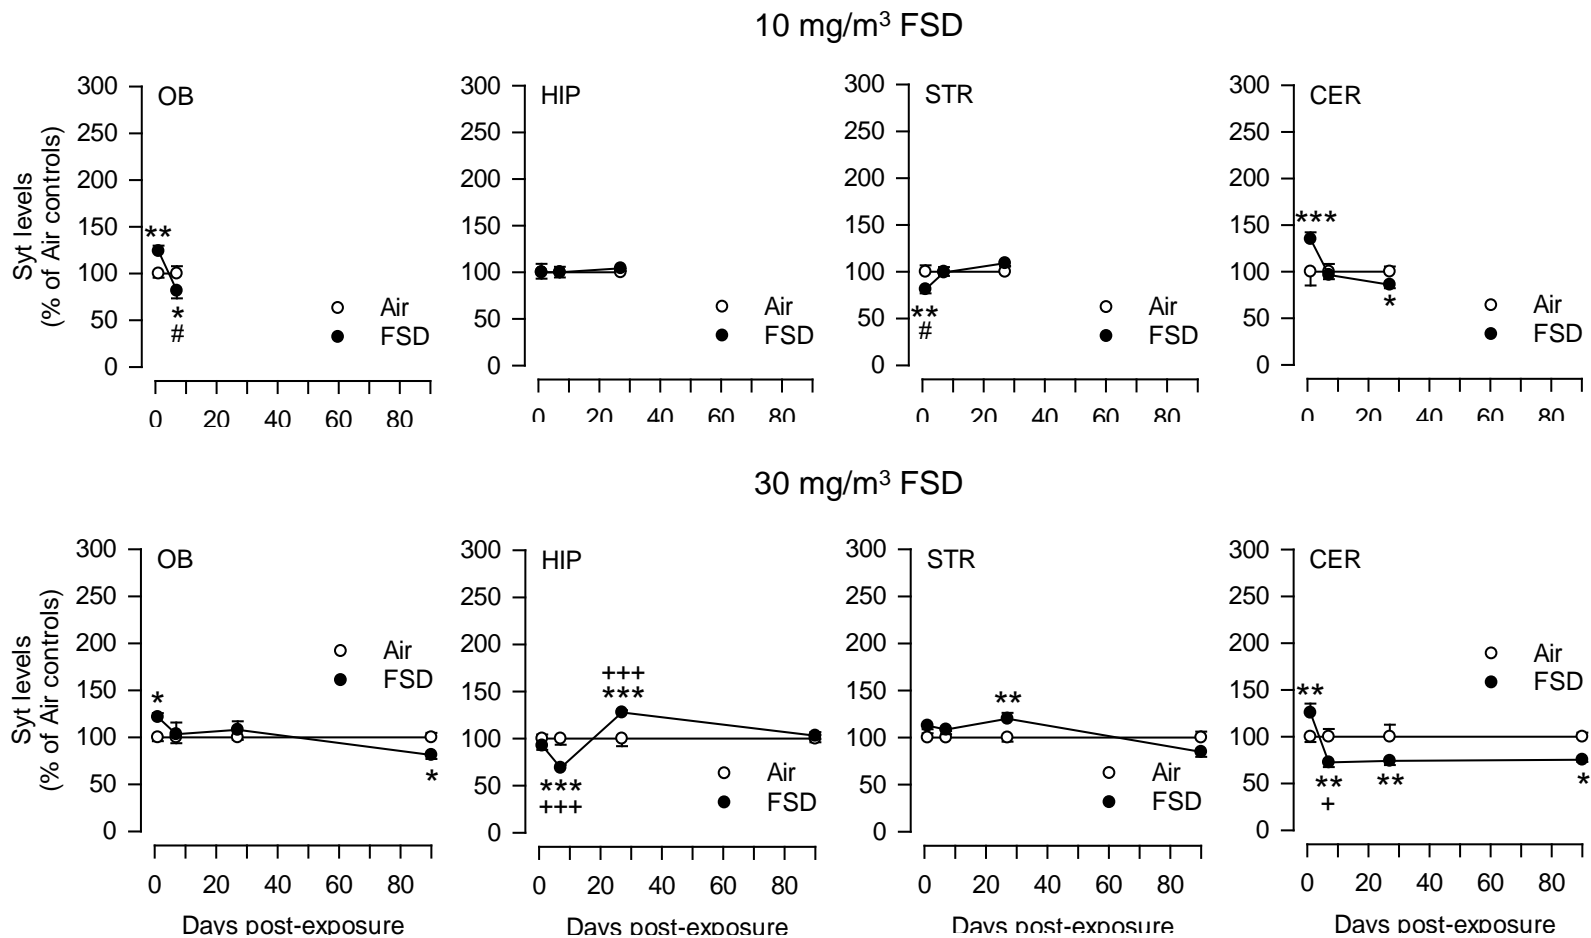

Fig. 16  
Sriram et al.

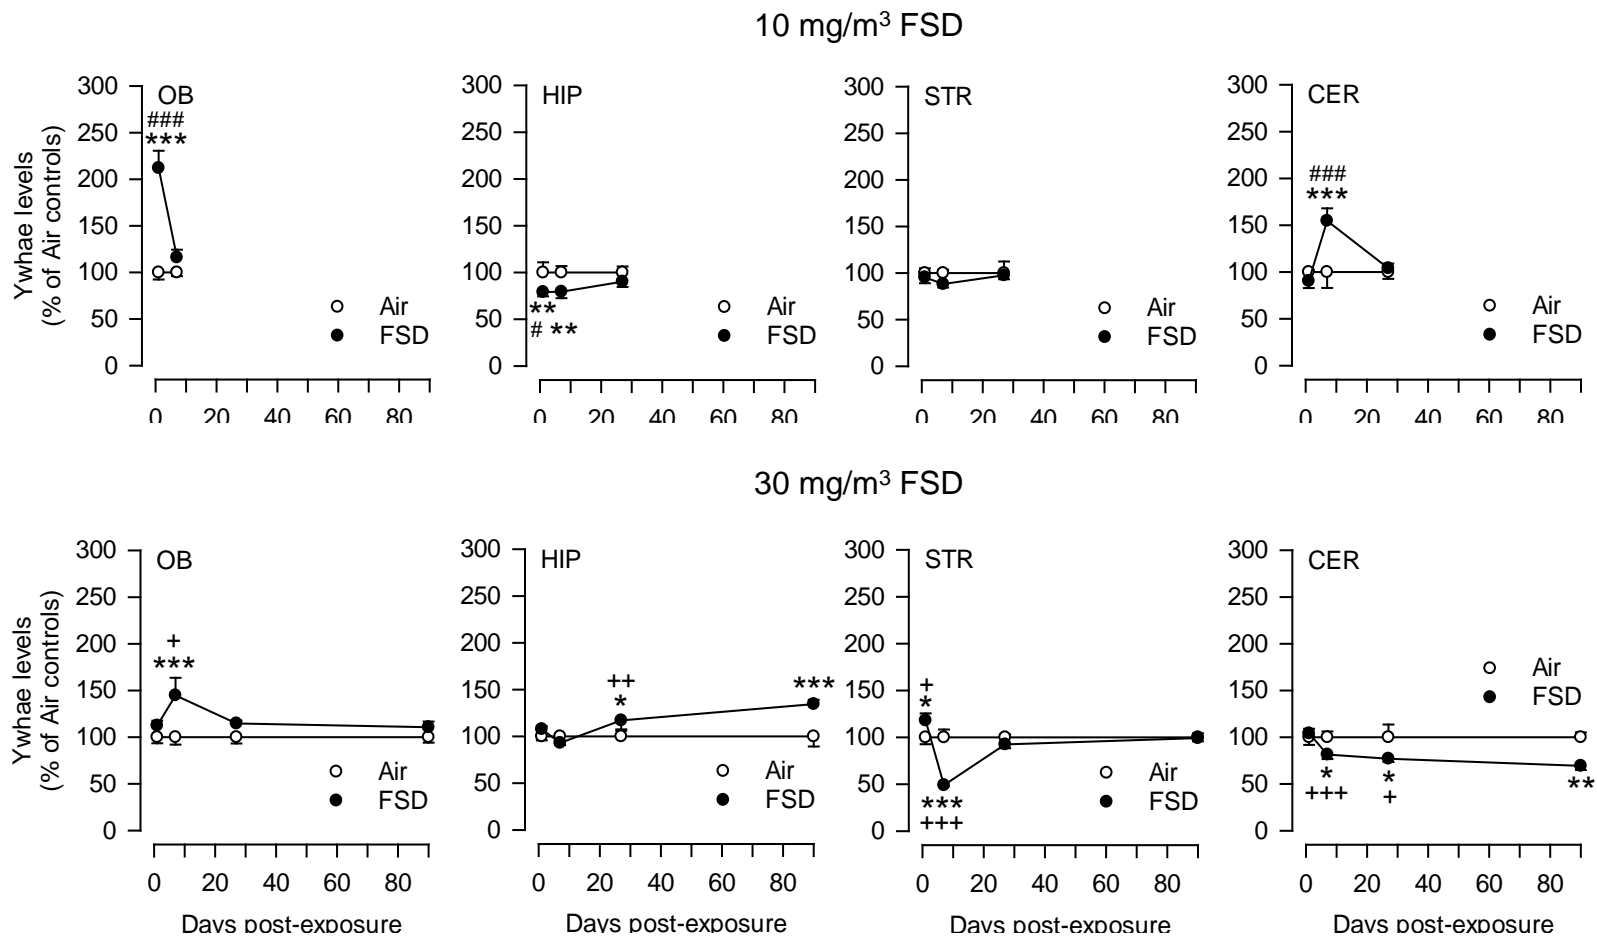



Fig. 17  
Sriram et al.

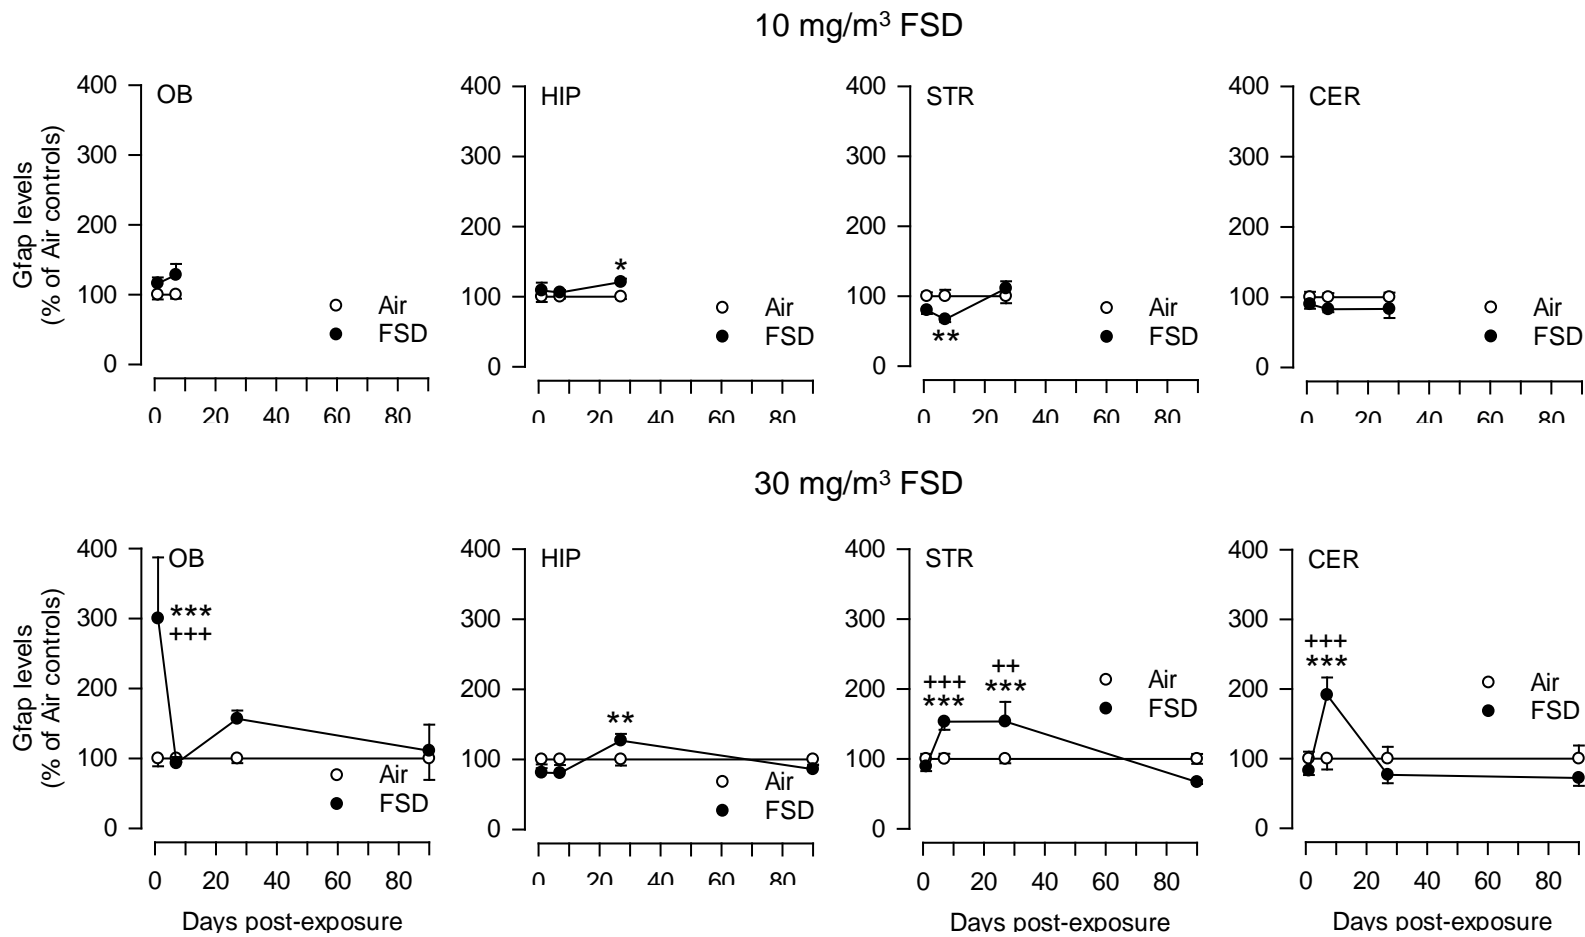

Fig. 18  
Sriram et al.

10 mg/m<sup>3</sup> FSD

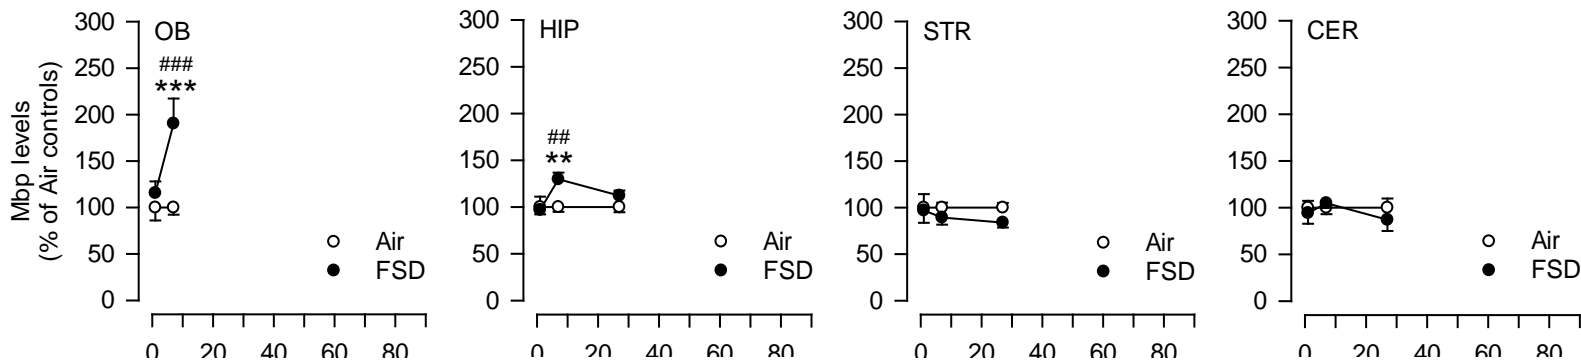

30 mg/m<sup>3</sup> FSD

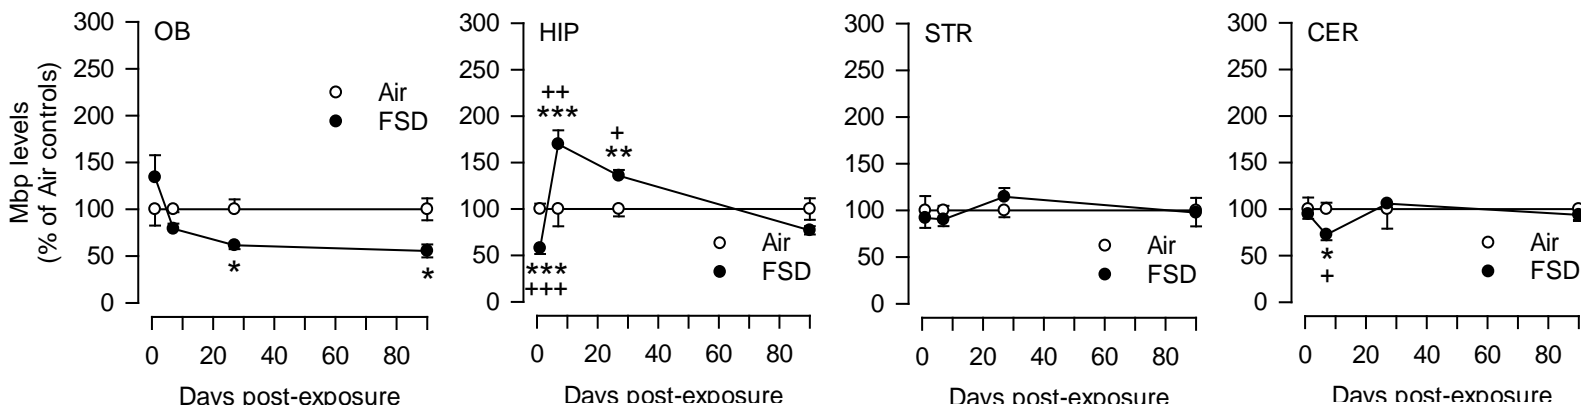

Fig. S1 A  
Sriram et al

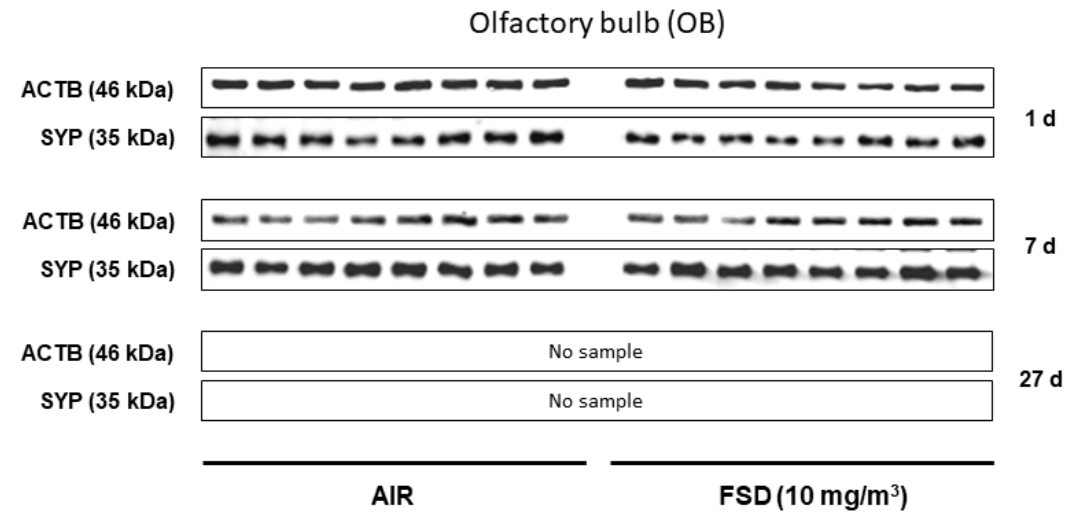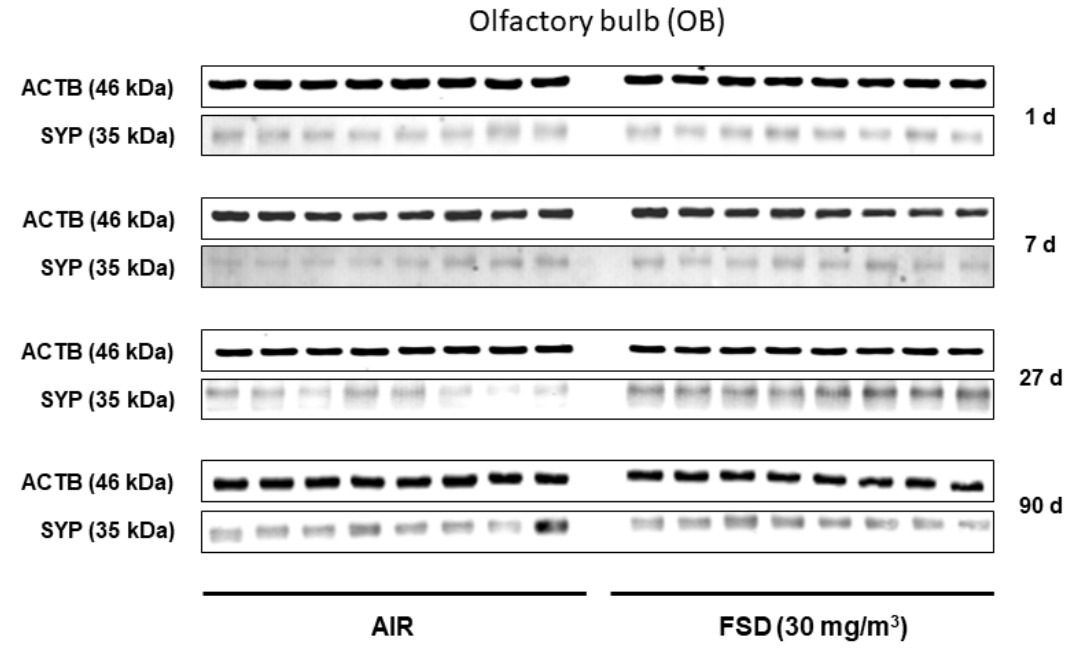

Fig. S1 B  
Sriram et al

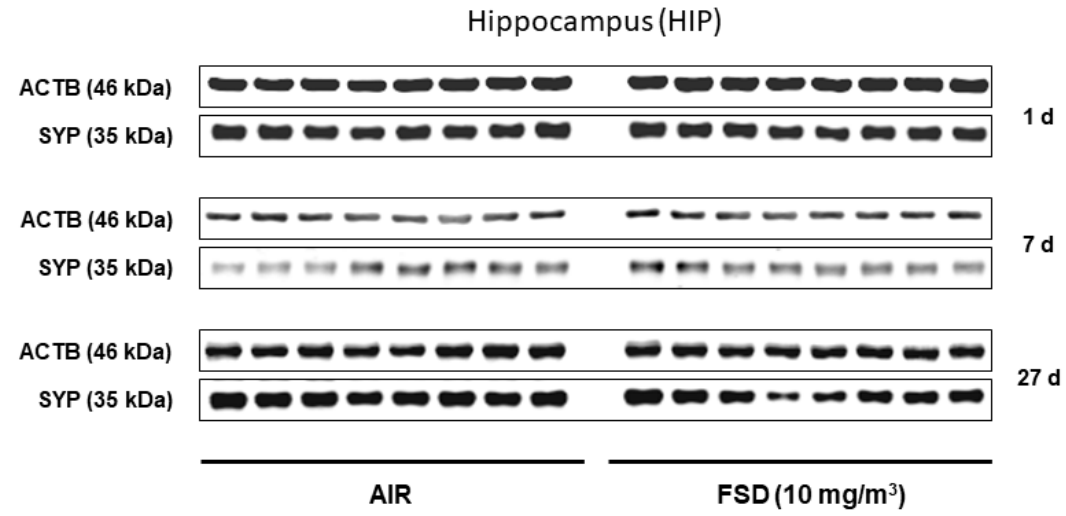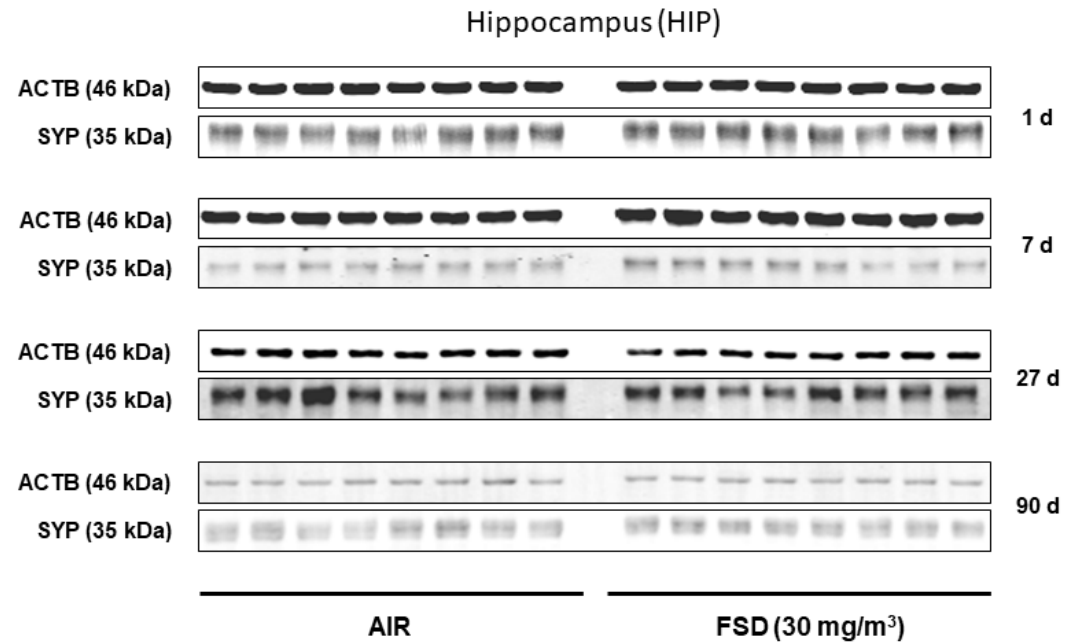

Fig. S1 C  
Sriram et al

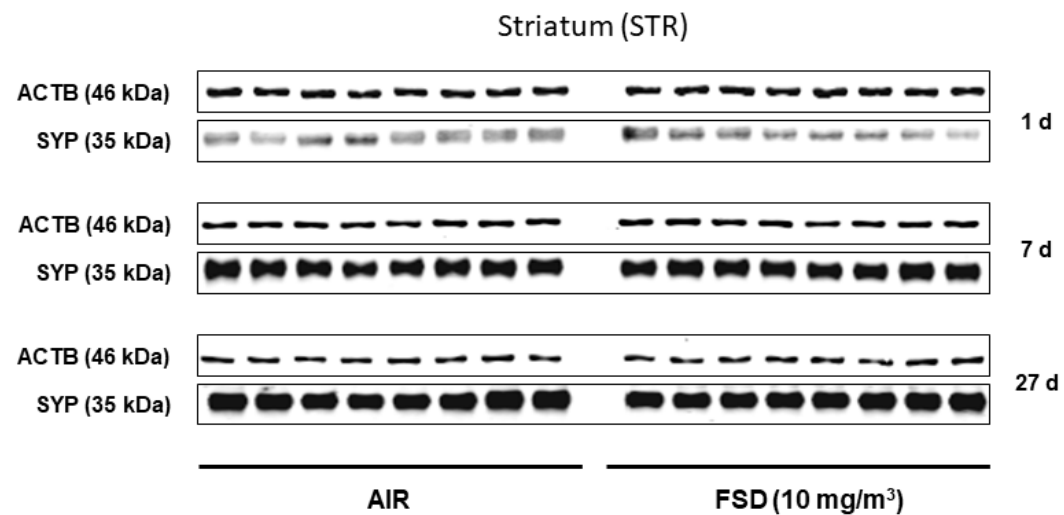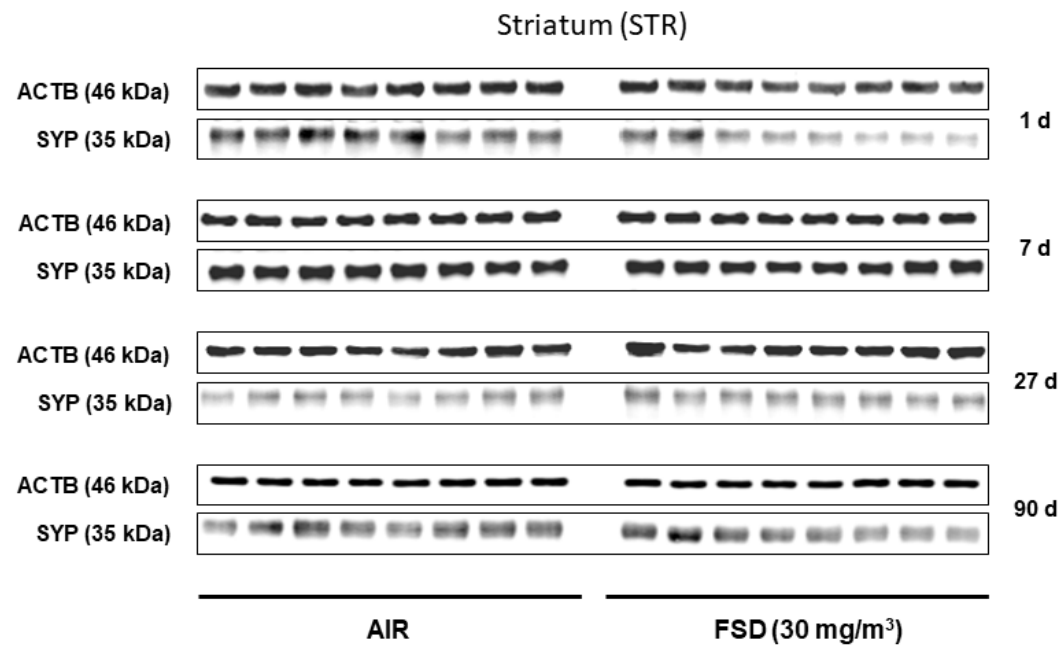

Fig. S1 D  
Sriram et al

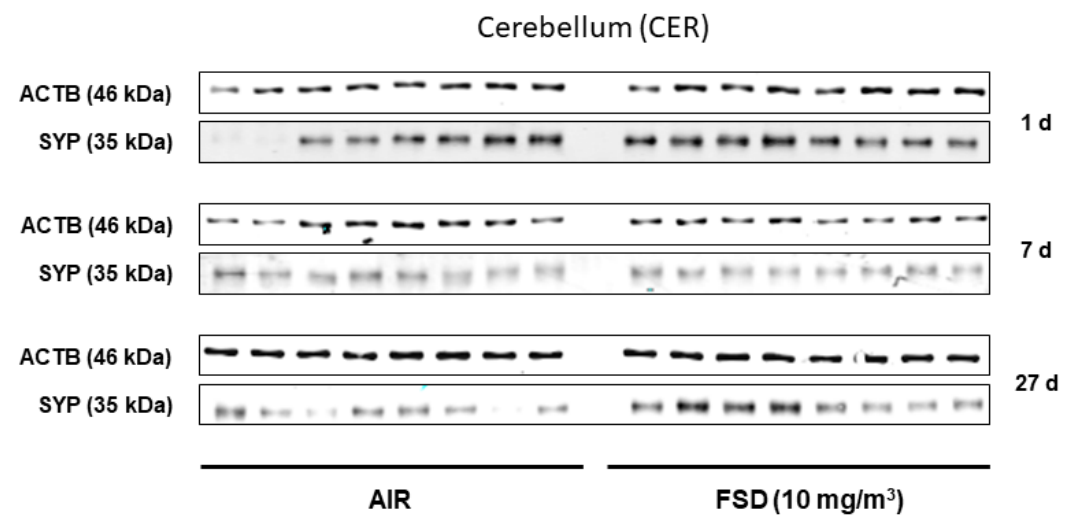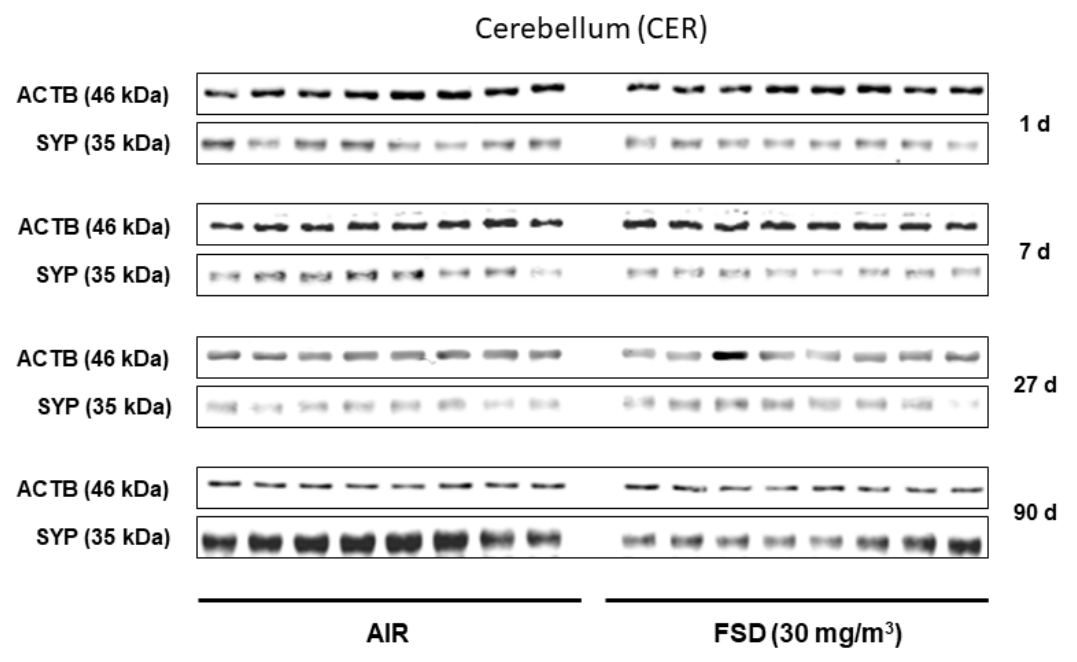

Fig. S2 A  
Sriram et al

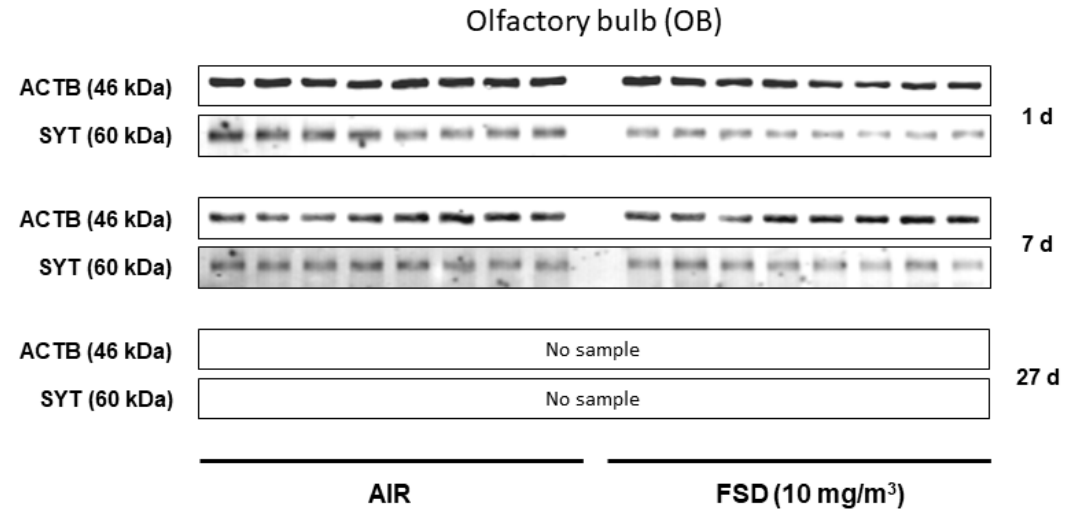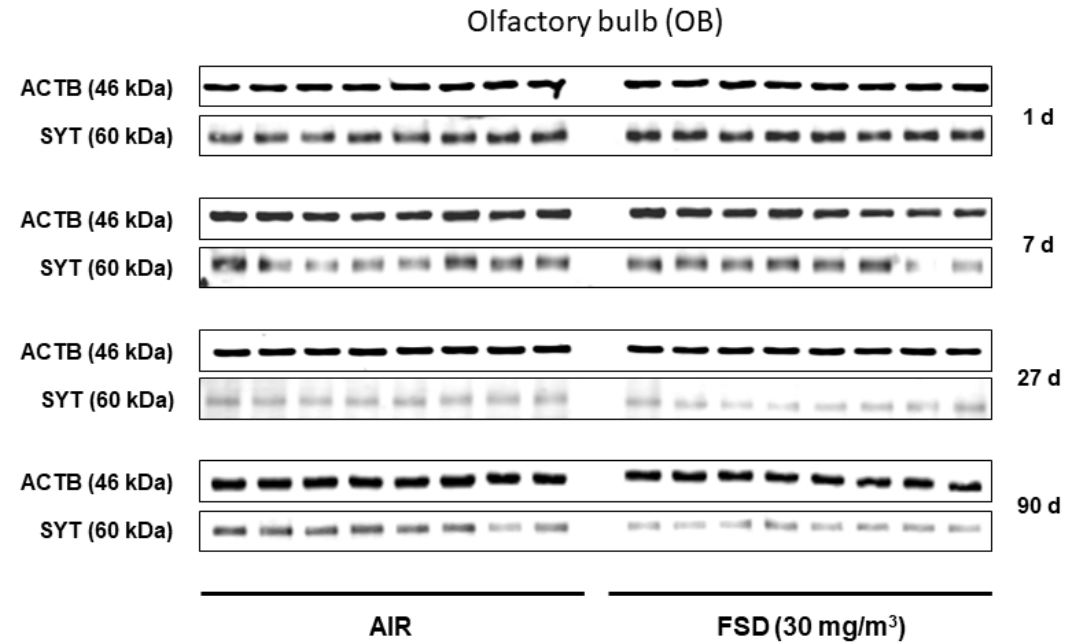

Fig. S2 B  
Sriram et al

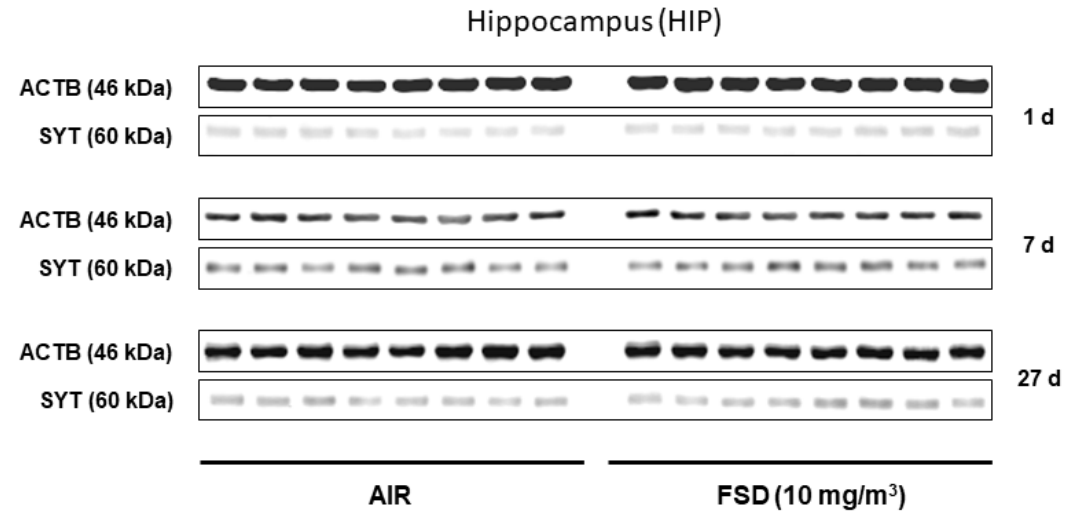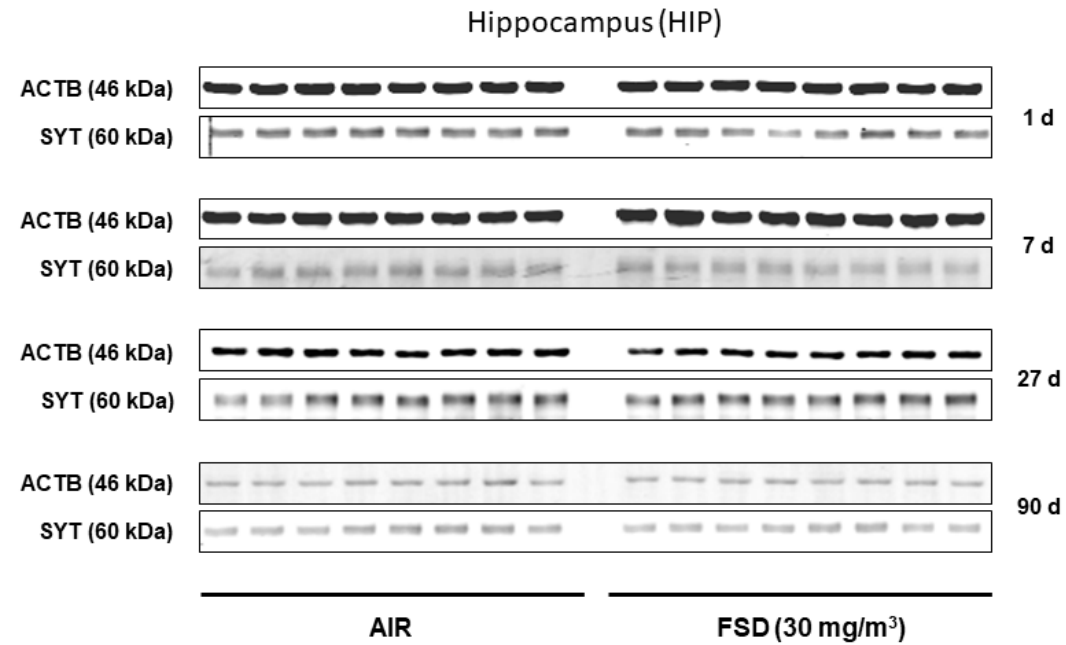



Fig. S2 C  
Sriram et al

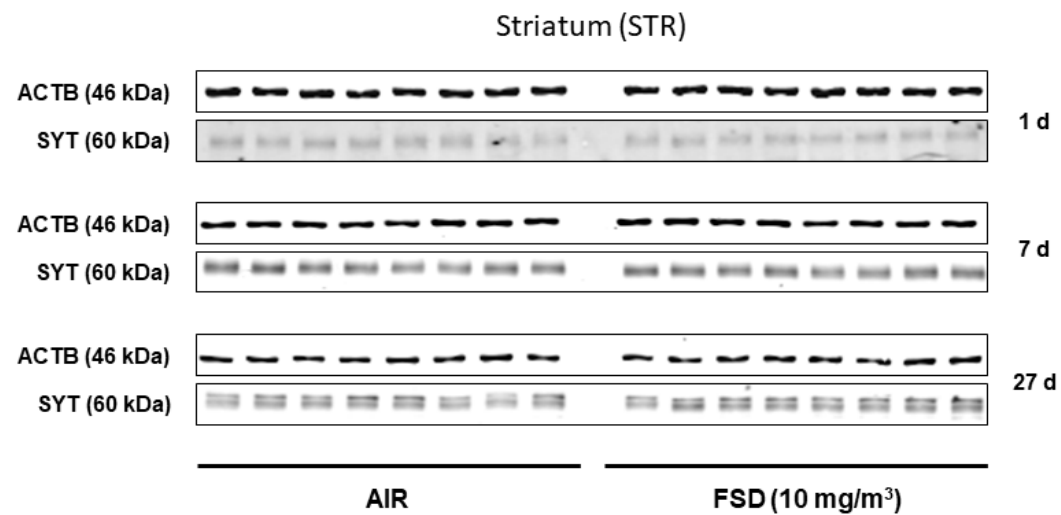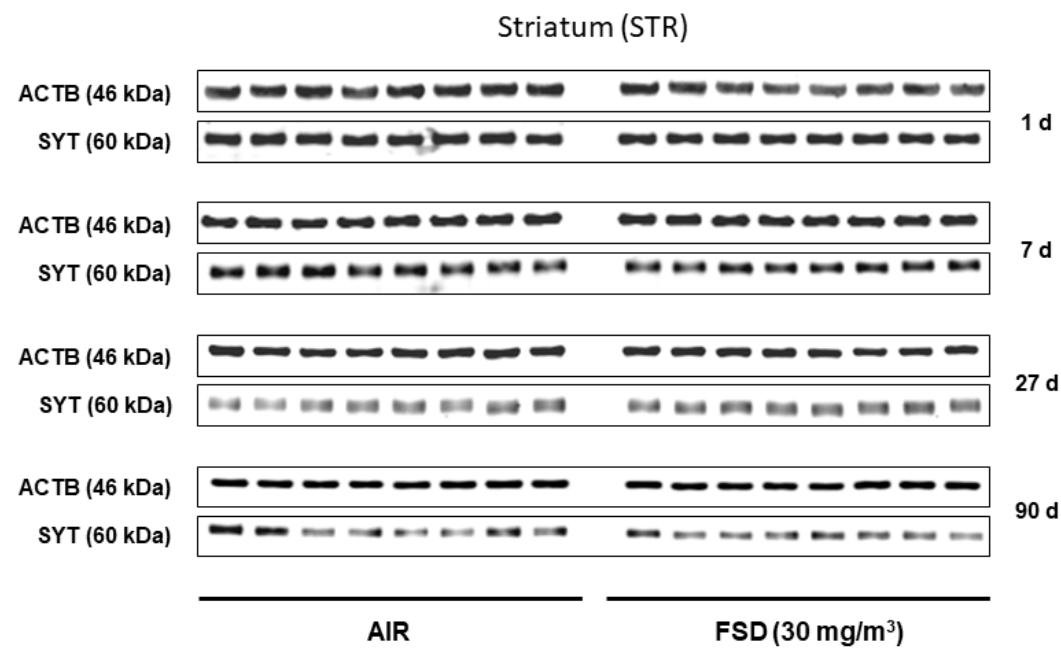

Fig. S2 D  
Sriram et al

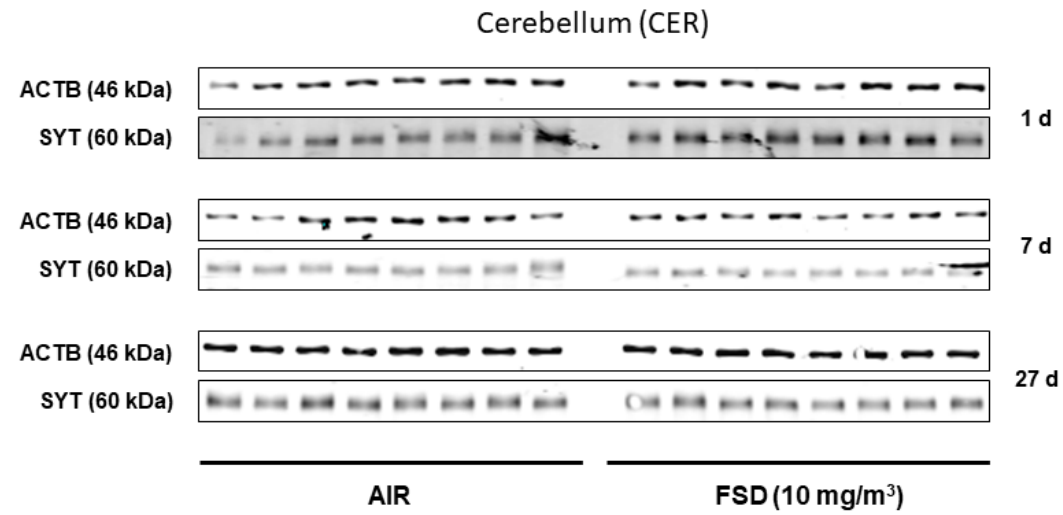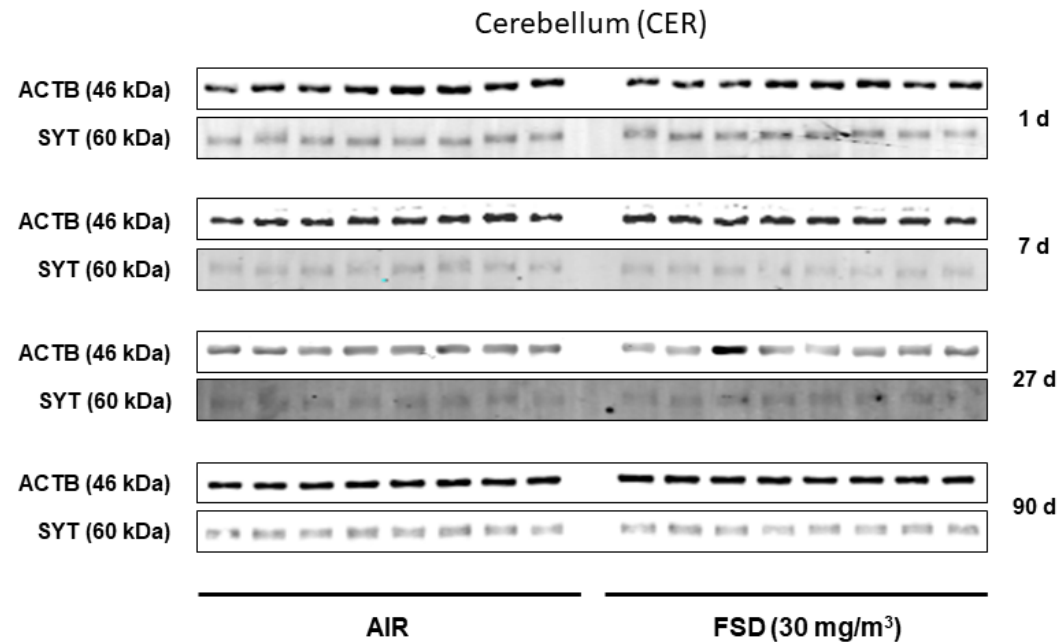

Fig. S3 A  
Sriram et al

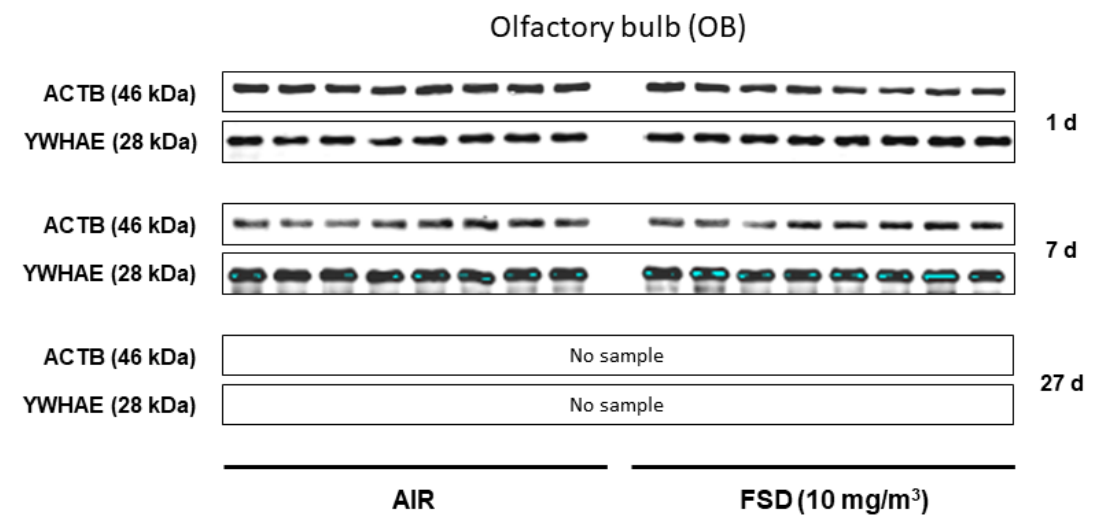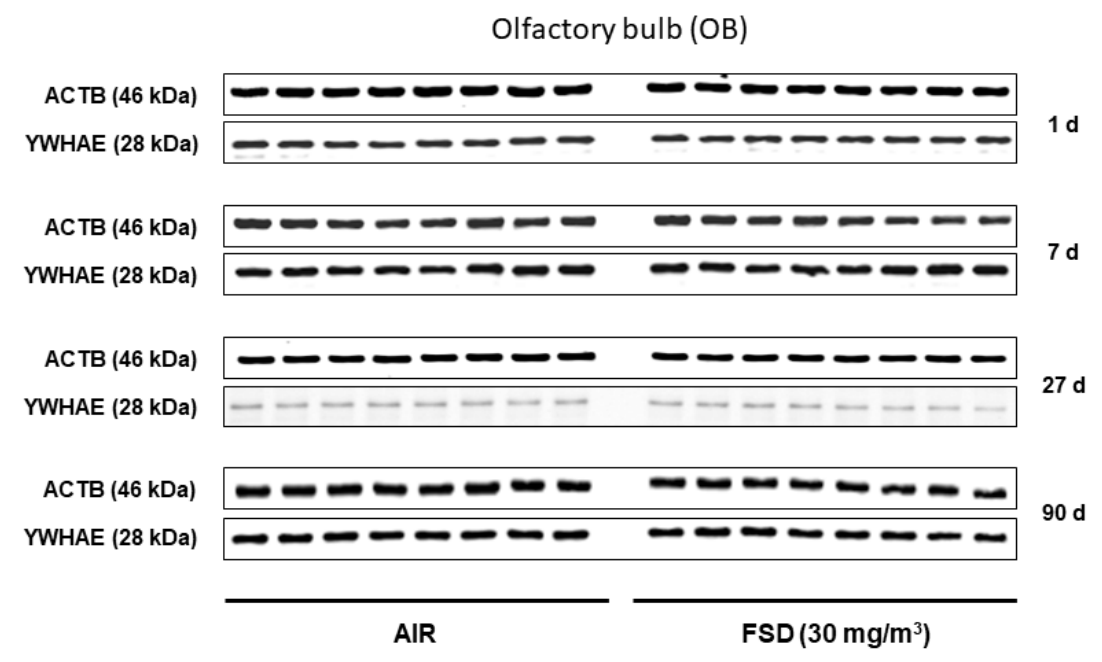

Fig. S3 B  
Sriram et al

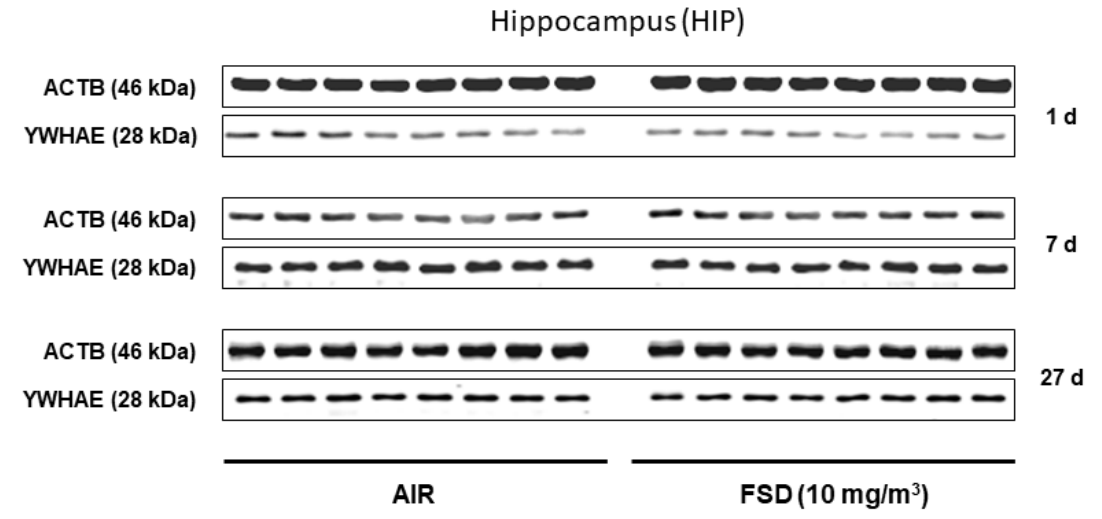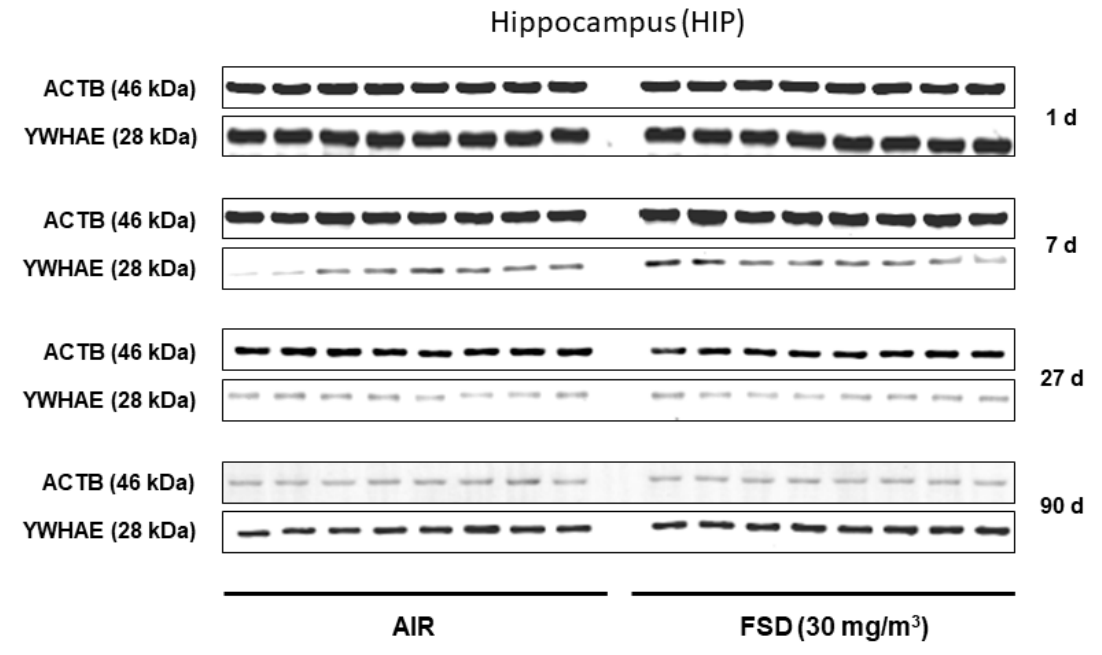

Fig. S3 C  
Sriram et al

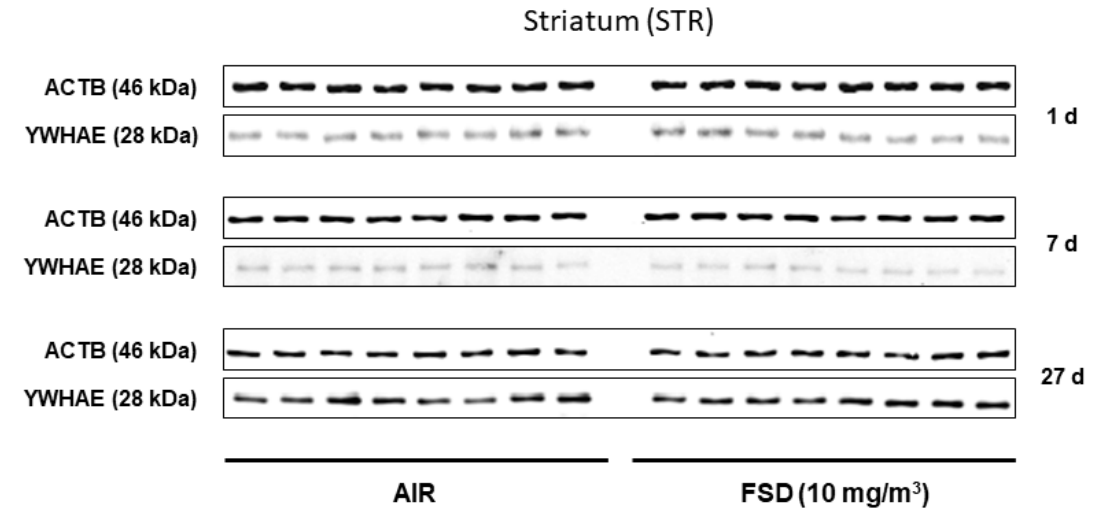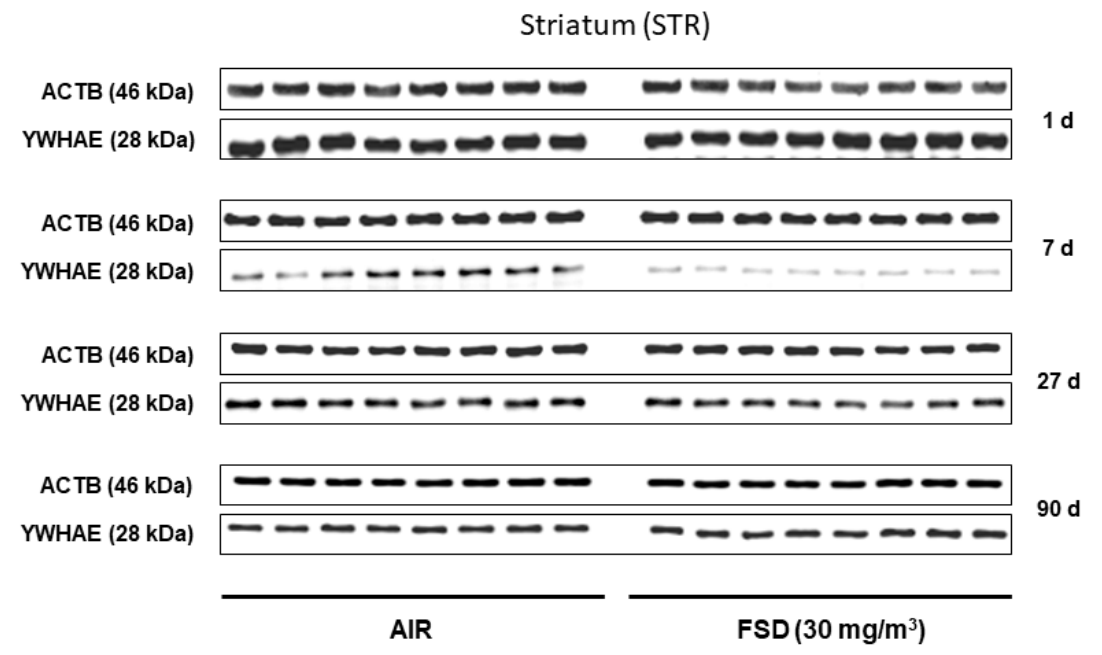

Fig. S3 D  
Sriram et al

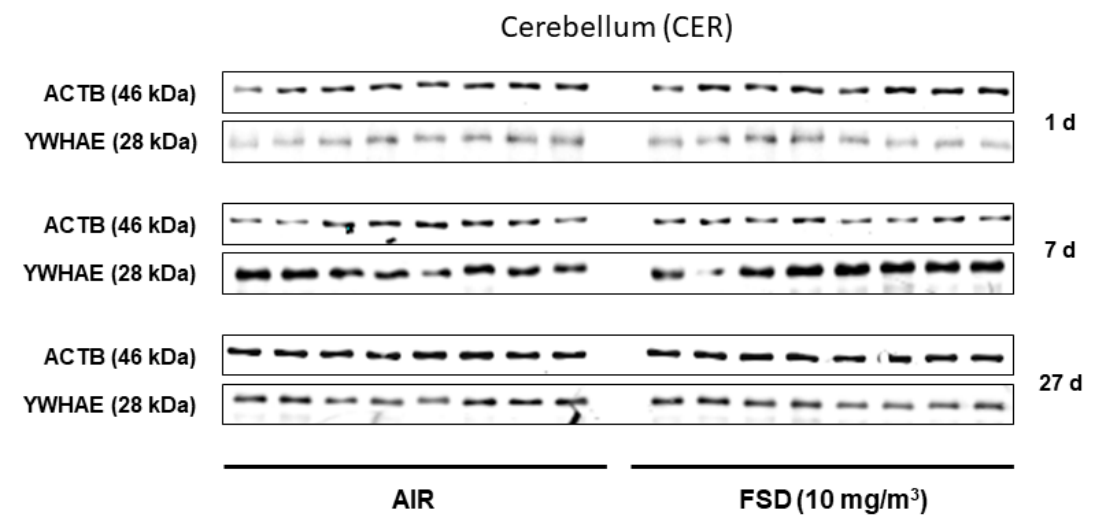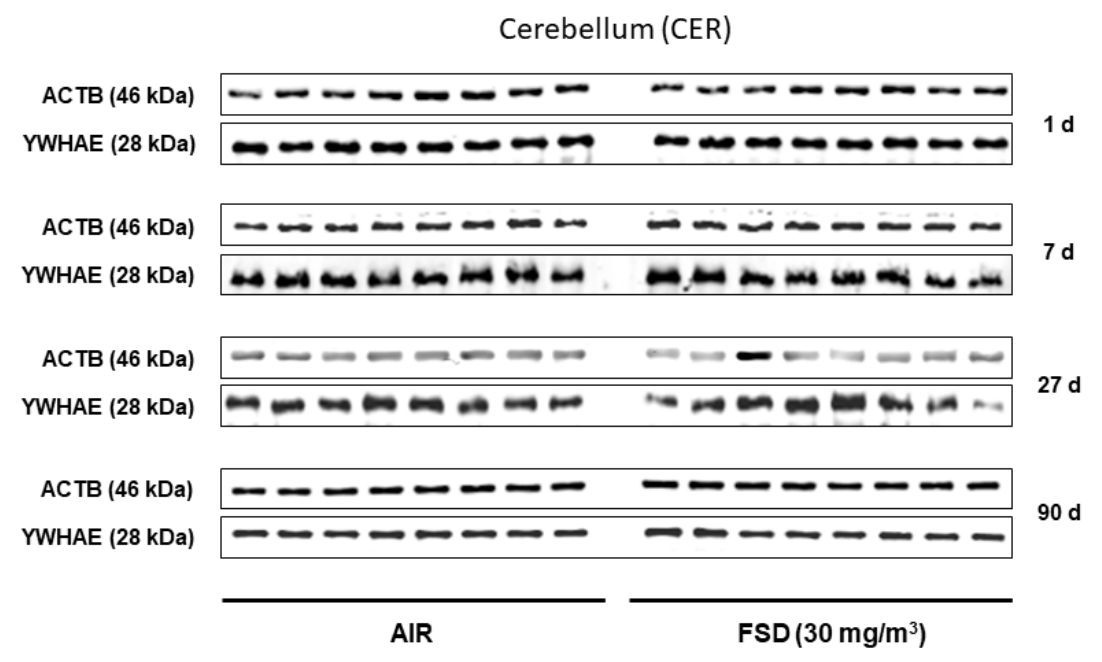

Fig. S4 A  
Sriram et al

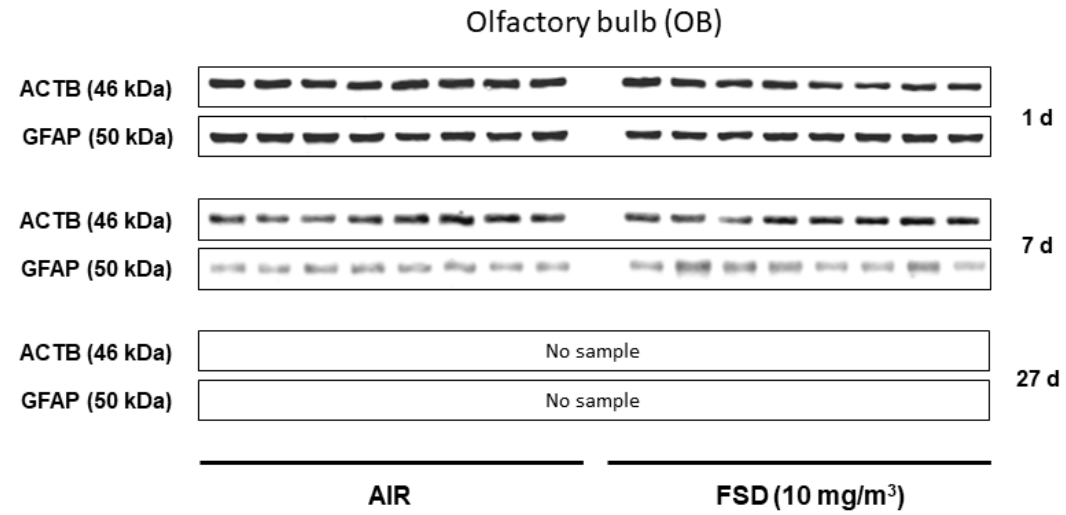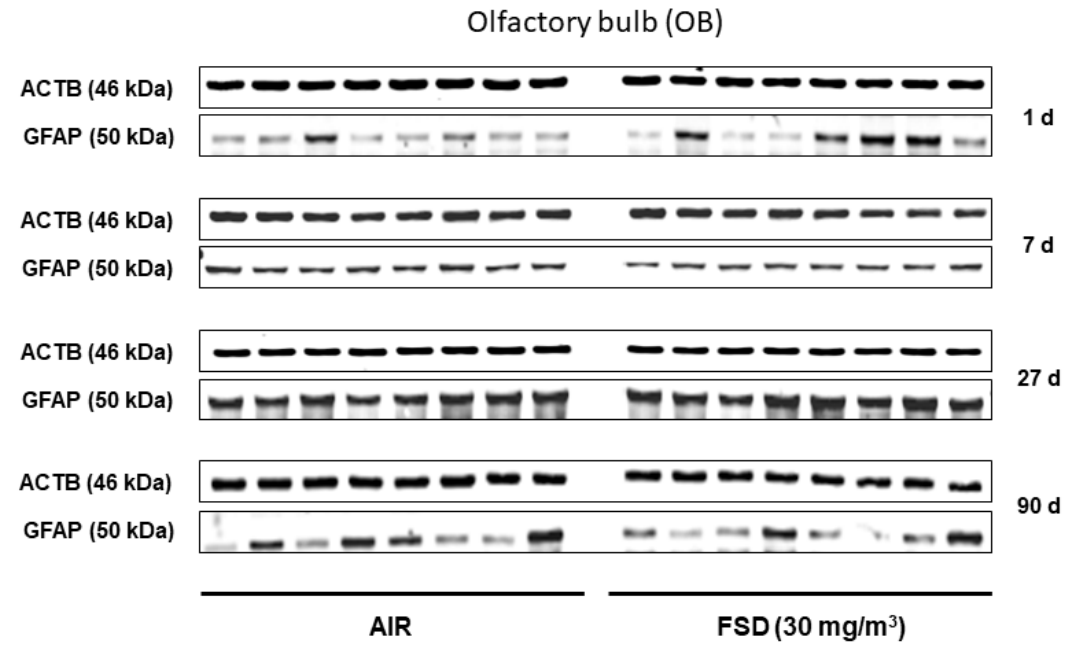

Fig. S4 B  
Sriram et al

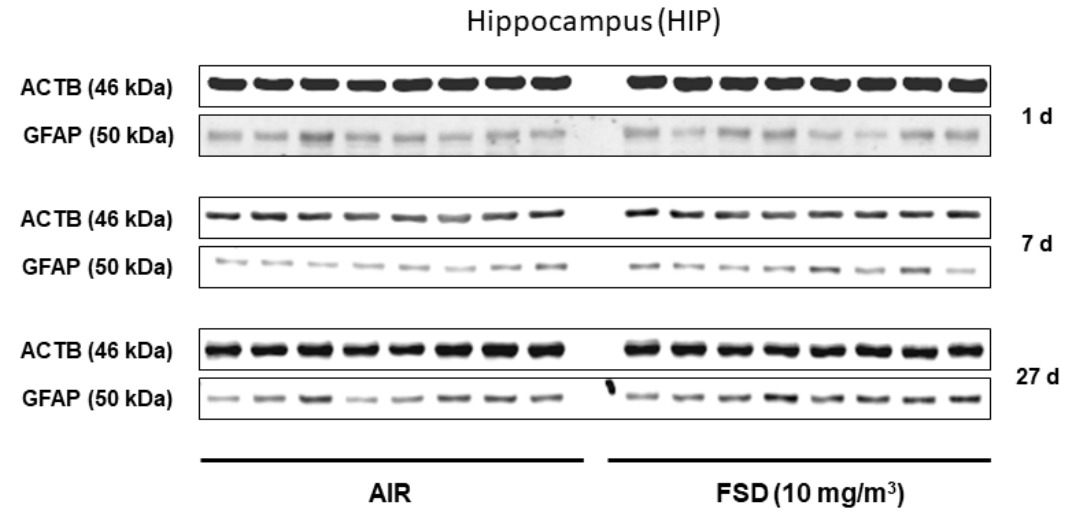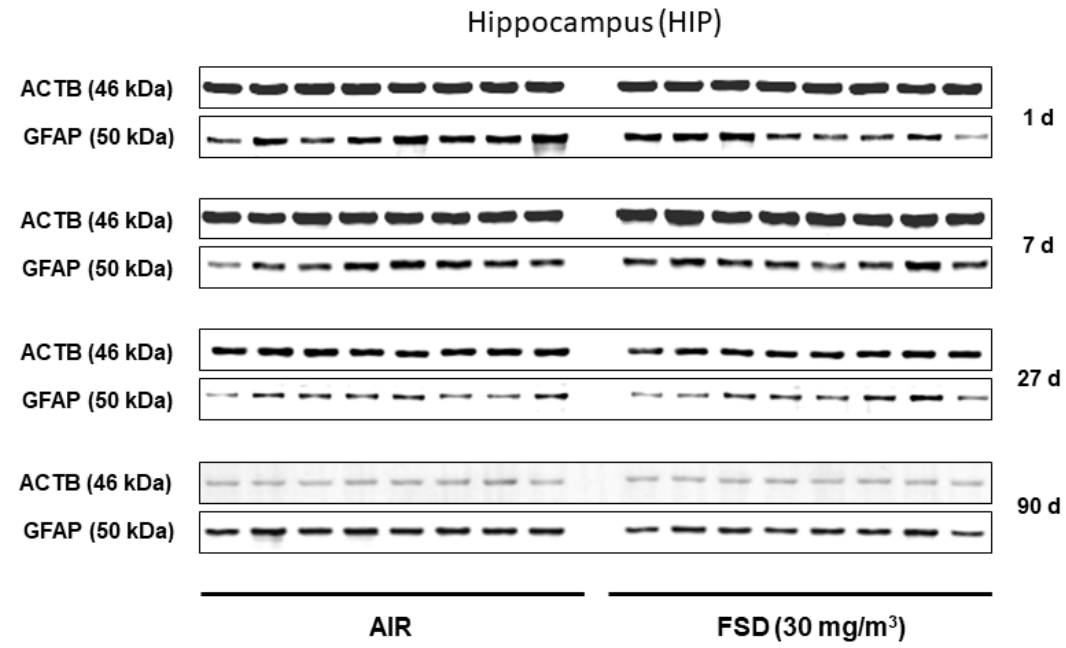



Fig. S4 C  
Sriram et al

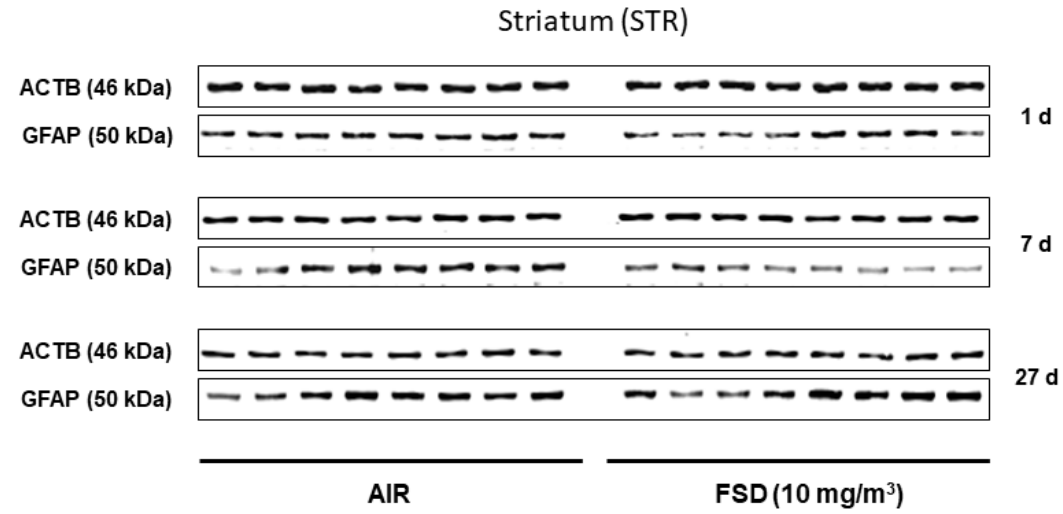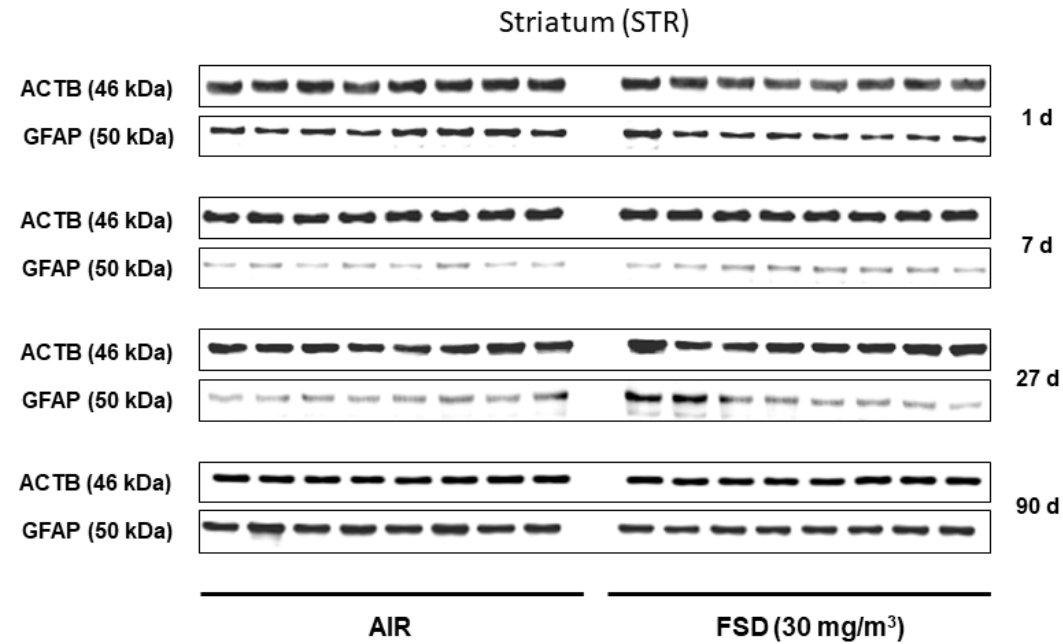

Fig. S4 D  
Sriram et al

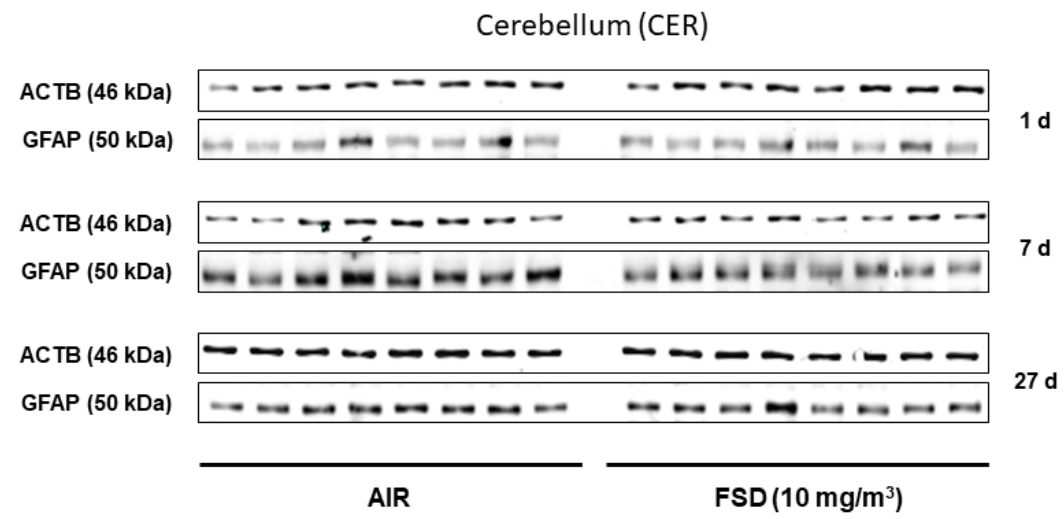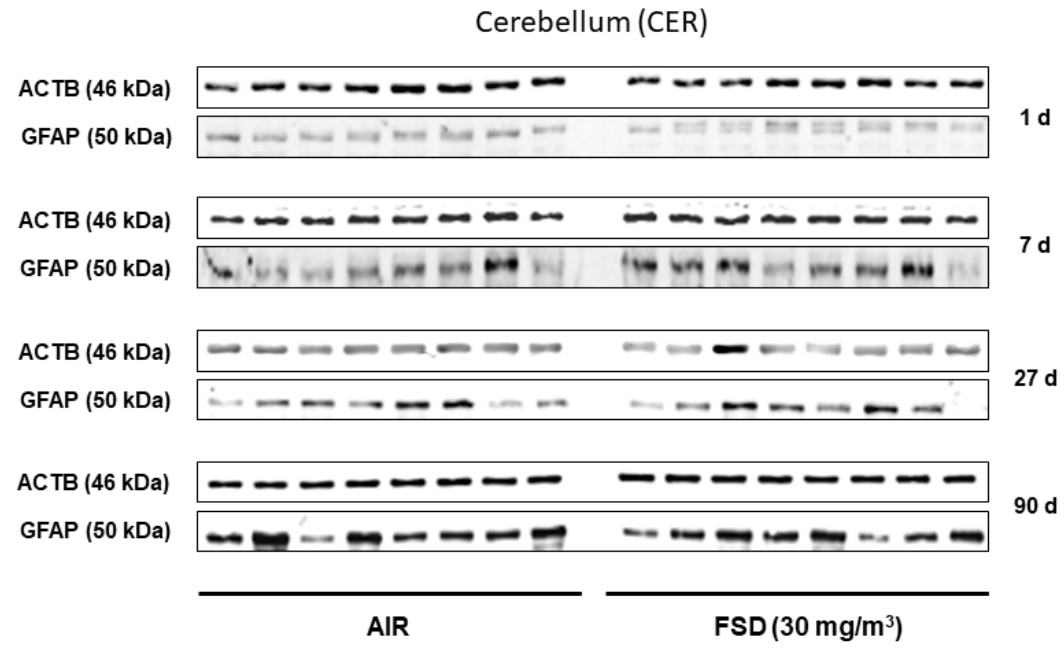

Fig. S5 A  
Sriram et al

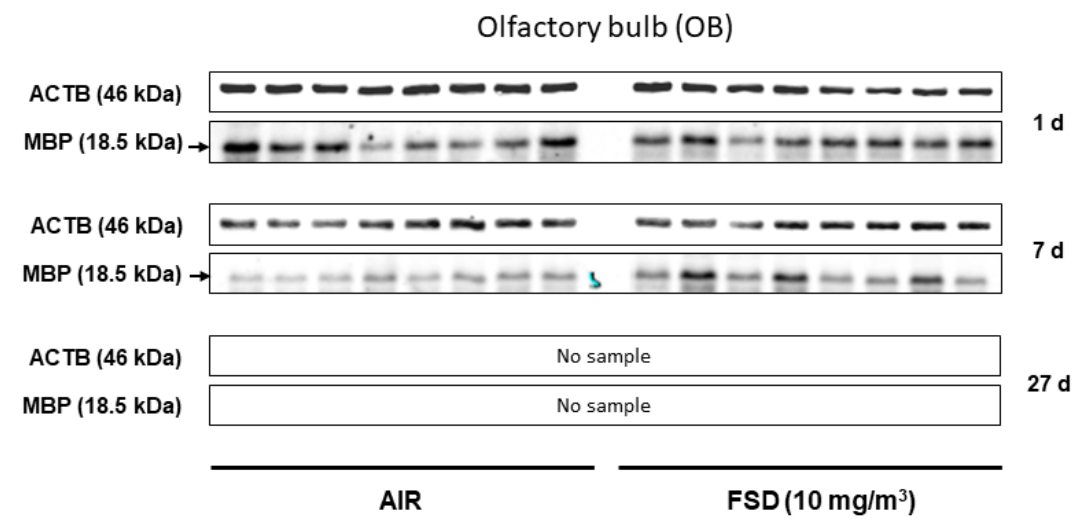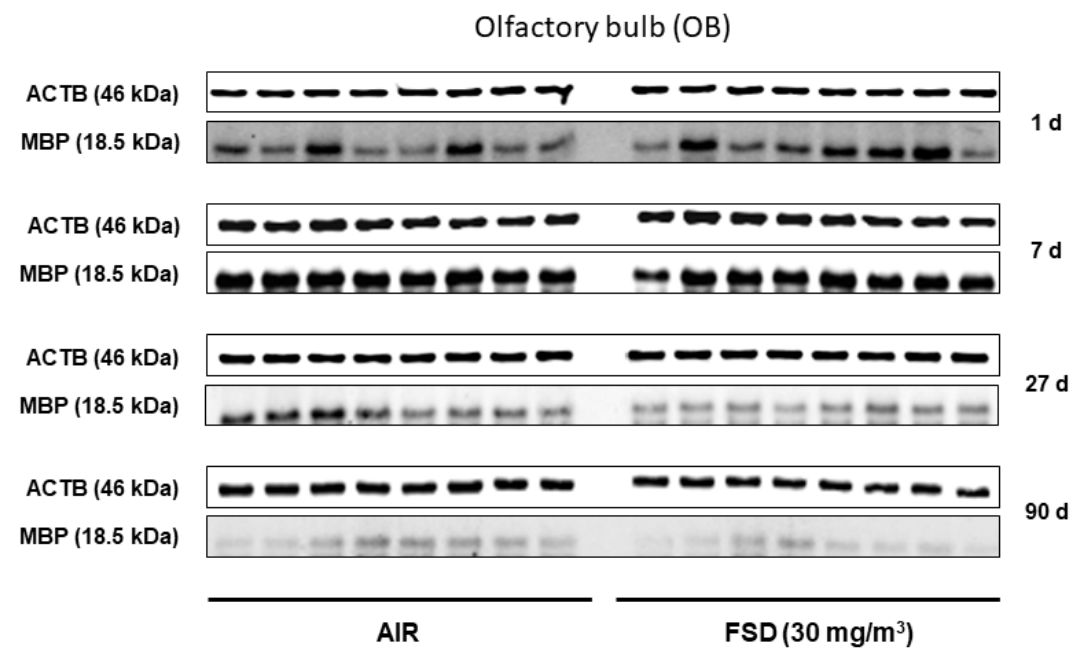

Fig. S5 B  
Sriram et al

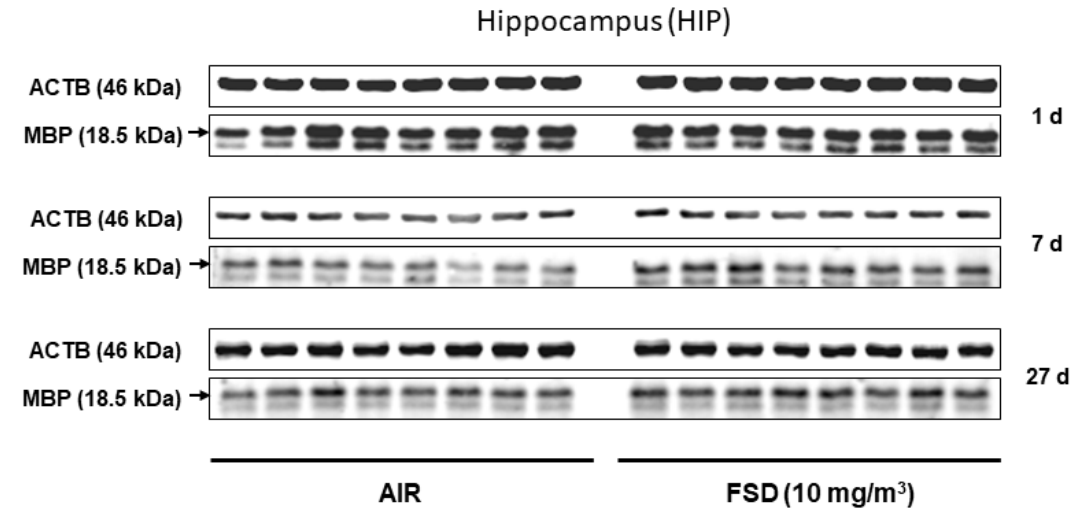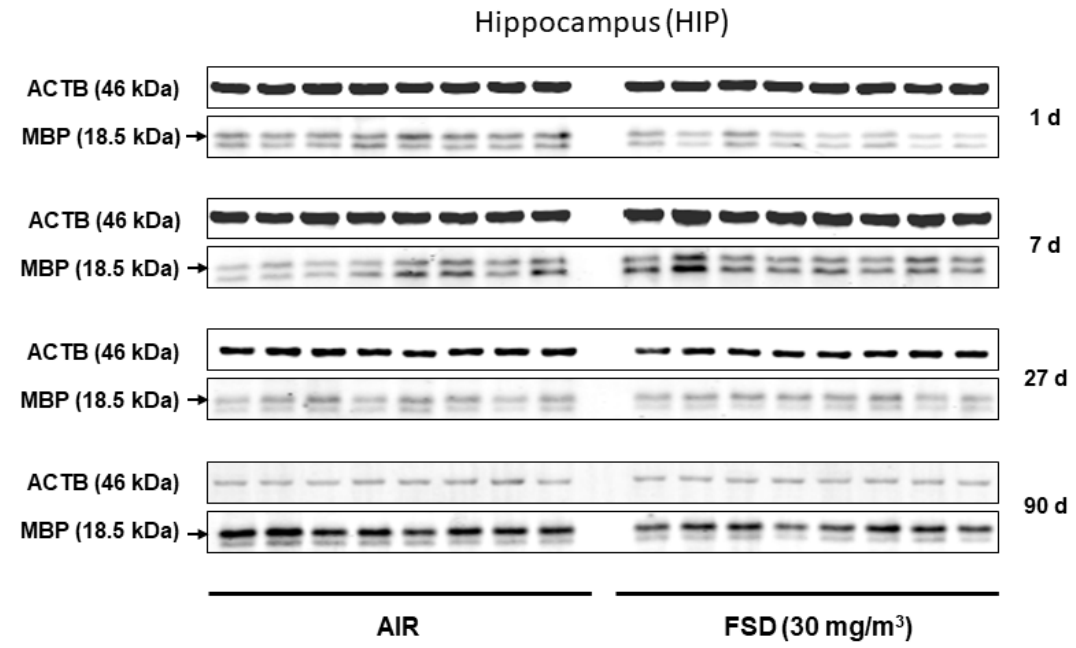

Fig. S5 C  
Sriram et al

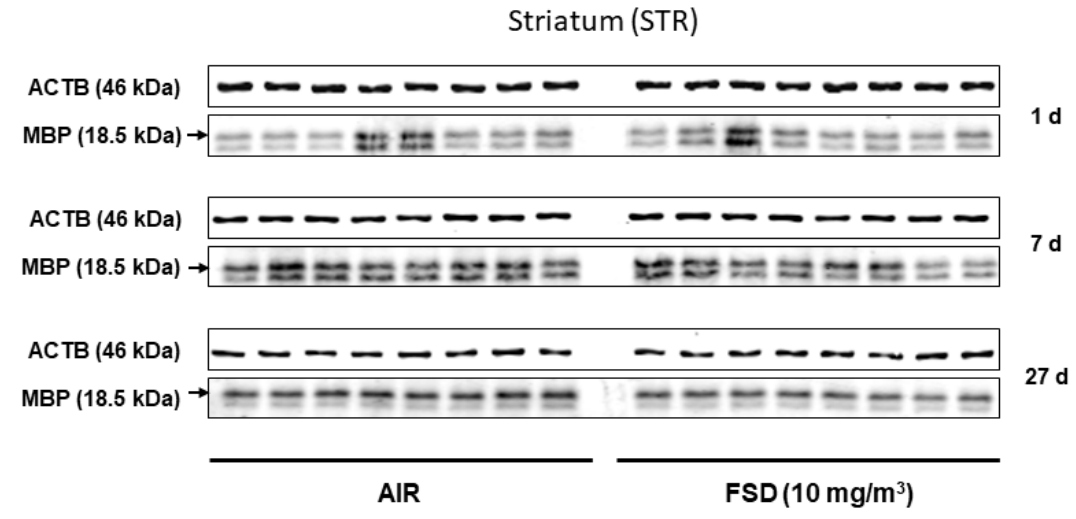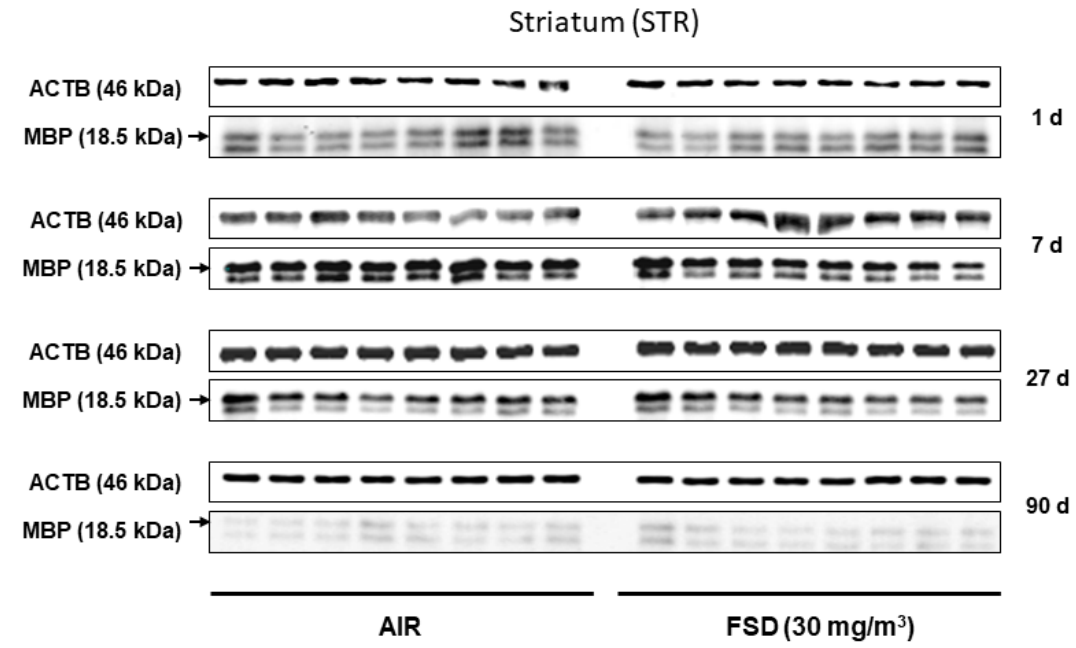

Fig. S5 D  
Sriram et al

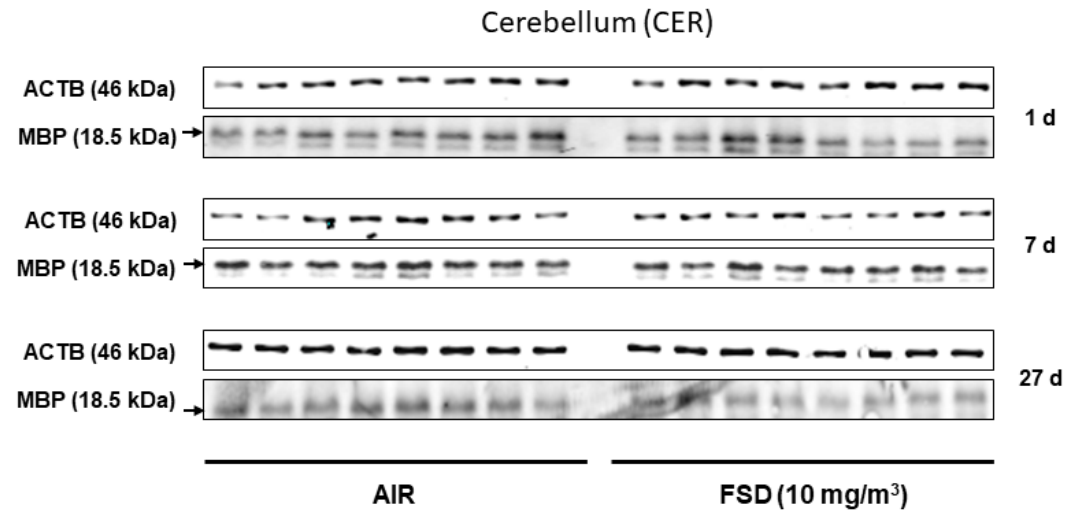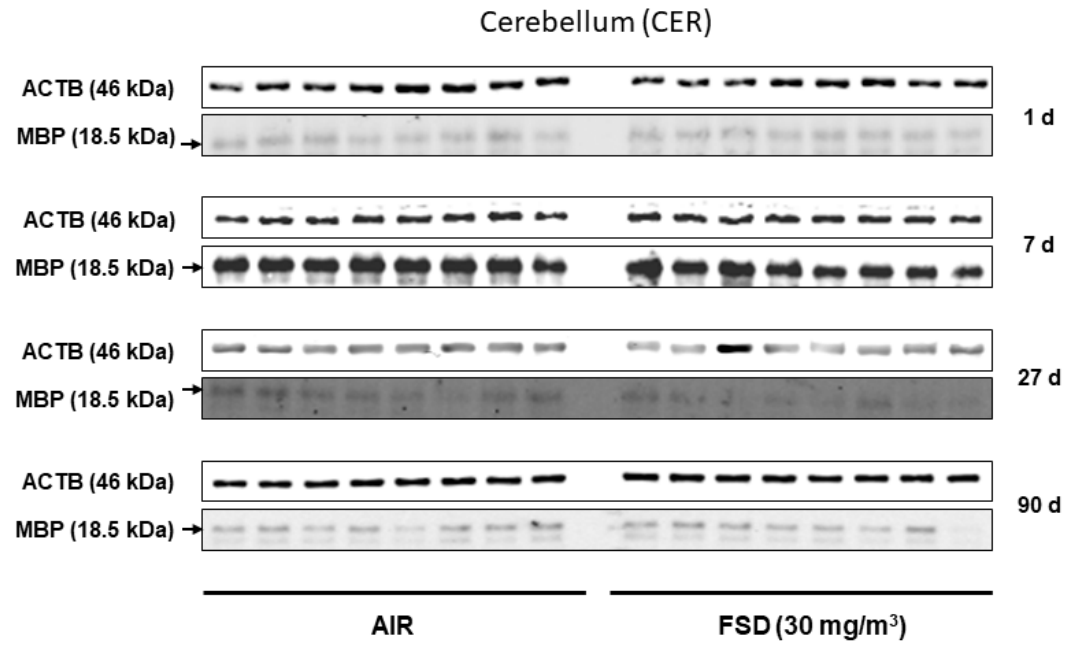

**Table 1:** Metabolites of dopamine and serotonin in olfactory bulb and hippocampus

| <b>Brain Region</b> | <b>Group</b> | <b>Dose</b>          | <b>DOPAC</b>         | <b>HVA</b>                      | <b>5-HIAA</b>           |              |
|---------------------|--------------|----------------------|----------------------|---------------------------------|-------------------------|--------------|
| <b>OB</b>           | AIR 1 d      | 0                    | 100.0 ± 6.3          | 100.0 ± 7.6                     | 100.0 ± 14.7            |              |
|                     | FSD 8 8 1 d  | 10 mg/m <sup>3</sup> | 107.3 ± 7.1          | 104.2 ± 3.8                     | 99.4 ± 16.6             |              |
|                     | AIR 7 d      | 0                    | 100.0 ± 6.2          | 100.0 ± 4.5                     | 100.0 ± 11.1            |              |
|                     | FSD 8 7 d    | 10 mg/m <sup>3</sup> | 99.2 ± 6.6           | 97.5 ± 3.8                      | 92.2 ± 5.6              |              |
|                     | AIR 27 d     | 0                    | 100.0 ± 4.6          | 100.0 ± 11.9                    | 100.0 ± 7.2             |              |
|                     | FSD 8 27 d   | 10 mg/m <sup>3</sup> | 84.2 ± 7.8           | 90.6 ± 13.2                     | 92.2 ± 5.1              |              |
|                     | AIR 1 d      | 0                    | 100.0 ± 7.5          | 100.0 ± 7.4                     | 100.0 ± 15.0            |              |
|                     | FSD 8 1 d    | 30 mg/m <sup>3</sup> | 101.3 ± 4.2          | 89.9 ± 3.5                      | 76.8 ± 9.5              |              |
|                     | AIR 7 d      | 0                    | 100.0 ± 3.7          | 100.0 ± 5.7                     | 100.0 ± 4.8             |              |
|                     | FSD 8 7 d    | 30 mg/m <sup>3</sup> | <b>78.1 ± 4.6*</b>   | <b>79.0 ± 3.3*</b>              | 82.5 ± 4.4              |              |
|                     | AIR 27 d     | 0                    | 100.0 ± 4.1          | 100.0 ± 5.2                     | 100.0 ± 8.5             |              |
|                     | FSD 8 27 d   | 30 mg/m <sup>3</sup> | 94.3 ± 4.0           | 85.7 ± 5.4                      | 108.3 ± 8.6             |              |
|                     | <b>HIP</b>   | AIR 1 d              | 0                    | 100.0 ± 6.8                     | 100.0 ± 9.3             | 100.0 ± 8.3  |
|                     |              | FSD 8 1 d            | 10 mg/m <sup>3</sup> | 107.5 ± 10.0                    | 98.5 ± 7.4 <sup>d</sup> | 100.9 ± 12.5 |
| AIR 7 d             |              | 0                    | 100.0 ± 5.7          | 100.0 ± 5.9                     | 100.0 ± 7.8             |              |
| FSD 8 7 d           |              | 10 mg/m <sup>3</sup> | 121.4 ± 8.3          | <b>137.2 ± 12.4<sup>#</sup></b> | 114.3 ± 3.7             |              |
| AIR 27 d            |              | 0                    | 100.0 ± 8.3          | 100.0 ± 4.3                     | 100.0 ± 3.1             |              |
| FSD 8 27 d          |              | 10 mg/m <sup>3</sup> | 84.6 ± 5.5           | 72.4 ± 6.4                      | 84.6 ± 4.2              |              |
| AIR 1 d             |              | 0                    | 100.0 ± 3.9          | 100.0 ± 14.2                    | 100.0 ± 4.4             |              |
| FSD 8 1 d           |              | 30 mg/m <sup>3</sup> | 102.7 ± 3.7          | 83.5 ± 7.4                      | 92.8 ± 3.5              |              |
| AIR 7 d             |              | 0                    | 100.0 ± 5.1          | 100.0 ± 11.4                    | 100.0 ± 4.6             |              |
| FSD 8 7 d           |              | 30 mg/m <sup>3</sup> | 86.9 ± 3.4           | 83.8 ± 6.3                      | 80.2 ± 8.4              |              |
| AIR 27 d            |              | 0                    | 100.0 ± 16.3         | 100.0 ± 8.3                     | 100.0 ± 6.0             |              |
| FSD 8 27 d          |              | 30 mg/m <sup>3</sup> | 95.2 ± 5.1           | 78.9 ± 4.0 <sup>c</sup>         | 93.7 ± 4.2              |              |

Values were calculated as ng/mg protein and are expressed as percent of corresponding air-exposed

control. Data are mean SE ( $n = 8$ /group with the following exceptions: <sup>c</sup> $n = 7$  due to one undetected

sample in assay group; <sup>d</sup> $n = 6$  due to two undetected samples in assay group). \*Significant decrease from corresponding air-exposed control ( $P < 0.05$ ). #Significant increase from corresponding air-exposed control ( $P < 0.05$ ).



**Table 2.** Metabolites of dopamine and serotonin in striatum and cerebellum

| Brain Region | Group      | Dose                 | DOPAC                   | HVA         | 5-HIAA      |
|--------------|------------|----------------------|-------------------------|-------------|-------------|
| STR          | AIR 1 d    | 0                    | 100.0 ± 9.3             | 100.0 ± 6.2 | 100.0 ± 8.8 |
|              | FSD 8 1 d  | 10 mg/m <sup>3</sup> | 93.9 ± 6.2              | 97.6 ± 3.6  | 102.8 ± 5.0 |
|              | AIR 7 d    | 0                    | 100.0 ± 4.8             | 100.0 ± 3.6 | 100.0 ± 8.0 |
|              | FSD 8 7 d  | 10 mg/m <sup>3</sup> | 121.1 ± 5.0             | 118.1 ± 5.9 | 97.6 ± 4.5  |
|              | AIR 27 d   | 0                    | 100.0 ± 6.1             | 100.0 ± 7.5 | 100.0 ± 3.6 |
|              | FSD 8 27 d | 10 mg/m <sup>3</sup> | <b>78.4 ± 4.6*</b>      | 82.2 ± 6.5  | 82.3 ± 4.3  |
|              | AIR 1 d    | 0                    | 100.0 ± 3.0             | 100.0 ± 4.8 | 100.0 ± 4.3 |
|              | FSD 8 1 d  | 30 mg/m <sup>3</sup> | 109.6 ± 6.4             | 104.9 ± 6.1 | 94.9 ± 6.5  |
|              | AIR 7 d    | 0                    | 100.0 ± 5.9             | 100.0 ± 4.7 | 100.0 ± 4.5 |
|              | FSD 8 7 d  | 30 mg/m <sup>3</sup> | 92.4 ± 3.1              | 92.1 ± 3.9  | 97.6 ± 4.9  |
|              | AIR 27 d   | 0                    | 100.0 ± 2.3             | 100.0 ± 3.6 | 100.0 ± 6.9 |
|              | FSD 8 27 d | 30 mg/m <sup>3</sup> | 97.2 ± 5.1              | 89.1 ± 6.2  | 101.8 ± 6.8 |
| CER          | AIR 1 d    | 0                    | 100.0 ± 4.0             | 100.0 ± 5.4 | 100.0 ± 5.6 |
|              | FSD 8 1 d  | 10 mg/m <sup>3</sup> | 109.5 ± 4.8             | 100.2 ± 5.7 | 111.8 ± 4.7 |
|              | AIR 7 d    | 0                    | 100.0 ± 4.4             | 100.0 ± 5.7 | 100.0 ± 3.4 |
|              | FSD 8 7 d  | 10 mg/m <sup>3</sup> | 104.9 ± 2.6             | 103.6 ± 3.2 | 106.5 ± 3.2 |
|              | AIR 27 d   | 0                    | 100.0 ± 8.3             | 100.0 ± 9.7 | 100.0 ± 9.0 |
|              | FSD 8 27 d | 10 mg/m <sup>3</sup> | 97.0 ± 5.0              | 109.2 ± 7.5 | 96.9 ± 4.7  |
|              | AIR 1 d    | 0                    | 100.0 ± 6.5             | 100.0 ± 6.5 | 100.0 ± 4.8 |
|              | FSD 8 1 d  | 30 mg/m <sup>3</sup> | 102.3 ± 5.0             | 88.9 ± 3.6  | 97.8 ± 4.5  |
|              | AIR 7 d    | 0                    | 100.0 ± 3.8             | 100.0 ± 4.4 | 100.0 ± 3.0 |
|              | FSD 8 7 d  | 30 mg/m <sup>3</sup> | 88.4 ± 5.2 <sup>a</sup> | 92.8 ± 3.9  | 107.4 ± 4.6 |
|              | AIR 27 d   | 0                    | 100.0 ± 9.3             | 100.0 ± 6.2 | 100.0 ± 4.8 |
|              | FSD 8 27 d | 30 mg/m <sup>3</sup> | 102.4 ± 4.3             | 92.1 ± 12.6 | 94.9 ± 6.3  |

Values were calculated as ng/mg protein and are expressed as percent of corresponding air-exposed control. Data are mean ± SE (n = 8/group with the following exception: <sup>a</sup>n = 7 due to one outlier sample in assay group). \*Significant decrease from corresponding air-exposed control ( $P < 0.05$ ).

**Table 3:** Dopamine and serotonin metabolite ratios in the olfactory bulb and hippocampus

| <b>Brain Region</b> | <b>Group</b> | <b>Dose</b>          | <b>DOPAC/DA</b>      | <b>HVA/DA</b>            | <b>(DOPAC+HVA)/DA</b>      | <b>5-HIAA/5-HT</b>       |                         |
|---------------------|--------------|----------------------|----------------------|--------------------------|----------------------------|--------------------------|-------------------------|
| <b>OB</b>           | AIR 1 d      | 0                    | 100 ± 3.9            | 100 ± 4.2                | 100 ± 4.0                  | 100 ± 12.6               |                         |
|                     | FSD 8 1 d    | 10 mg/m <sup>3</sup> | 103.1 ± 3.9          | 99.7 ± 3.9               | 100.3 ± 3.9                | 102.1 ± 3.9              |                         |
|                     | AIR 7 d      | 0                    | 100 ± 5.4            | 100 ± 4.9                | 100 ± 4.7                  | 100 ± 5.3                |                         |
|                     | FSD 8 7 d    | 10 mg/m <sup>3</sup> | 96.6 ± 3.1           | 96.2 ± 3.1               | 96.2 ± 2.8                 | 80.8 ± 5.8               |                         |
|                     | AIR 27 d     | 0                    | 100 ± 5.7            | 100 ± 7.1                | 100 ± 4.8                  | 100 ± 8.6                |                         |
|                     | FSD 8 27 d   | 10 mg/m <sup>3</sup> | <b>84.0 ± 4.5*</b>   | 91.0 ± 7.9               | 88.0 ± 6.0                 | <b>138.3 ± 7.7#</b>      |                         |
|                     | AIR 1 d      | 0                    | 100 ± 6.2            | 100 ± 3.8                | 100 ± 4.2                  | 100 ± 12.4               |                         |
|                     | FSD 8 1 d    | 30 mg/m <sup>3</sup> | 105.6 ± 7.9          | 93.4 ± 4.8               | 98.2 ± 6.0                 | 88.3 ± 11.0              |                         |
|                     | AIR 7 d      | 0                    | 100 ± 6.4            | 100 ± 3.7                | 100 ± 3.6                  | 100 ± 3.6                |                         |
|                     | FSD 8 7 d    | 30 mg/m <sup>3</sup> | 98.7 ± 3.6           | 102.1 ± 5.0              | 100.8 ± 3.2                | 92.2 ± 4.1               |                         |
|                     | AIR 27 d     | 0                    | 100 ± 4.0            | 100 ± 4.5                | 100 ± 3.7                  | 100 ± 7.3                |                         |
|                     | FSD 8 27 d   | 30 mg/m <sup>3</sup> | 91.9 ± 4.2           | 83.2 ± 4.6               | 87.0 ± 4.0                 | 102.7 ± 9.4              |                         |
|                     | <b>HIP</b>   | AIR 1 d              | 0                    | 100 ± 14.3               | 100 ± 12.6                 | 100 ± 13.7               | 100 ± 3.5               |
|                     |              | FSD 8 1 d            | 10 mg/m <sup>3</sup> | 88.1 ± 7.9               | 83.9 ± 10.2 <sup>d</sup>   | 81.9 ± 8.8               | 85.0 ± 6.5              |
|                     |              | AIR 7 d              | 0                    | 100 ± 17.3               | 100 ± 13.9                 | 100 ± 15.0               | 100 ± 2.9               |
|                     |              | FSD 8 7 d            | 10 mg/m <sup>3</sup> | 83.9 ± 14.6 <sup>c</sup> | 91.3 ± 12.1 <sup>(c)</sup> | 87.6 ± 12.8 <sup>c</sup> | 97.9 ± 2.0 <sup>c</sup> |
|                     |              | AIR 27 d             | 0                    | 100 ± 8.7                | 100 ± 6.2                  | 100 ± 6.7                | 100 ± 4.5               |
|                     |              | FSD 8 27 d           | 10 mg/m <sup>3</sup> | 127.3 ± 27.2             | 104.1 ± 16.6               | 119.3 ± 23.3             | 93.1 ± 5.4              |
| AIR 1 d             |              | 0                    | 100 ± 8.6            | 100 ± 9.3                | 100 ± 7.2                  | 100 ± 3.0                |                         |
| FSD 8 1 d           |              | 30 mg/m <sup>3</sup> | 114.1 ± 13.0         | 94.4 ± 7.6               | 111.9 ± 12.3               | 97.7 ± 2.3               |                         |
| AIR 7 d             |              | 0                    | 100 ± 9.0            | 100 ± 9.3                | 100 ± 8.4                  | 100 ± 4.0                |                         |
| FSD 8 7 d           |              | 30 mg/m <sup>3</sup> | 100.1 ± 13.8         | 99.2 ± 13.7              | 100 ± 13.6                 | 83.5 ± 7.7               |                         |
| AIR 27 d            |              | 0                    | 100 ± 23.3           | 100 ± 12.5               | 100 ± 19.0                 | 100 ± 9.3                |                         |
| FSD 8 27 d          |              | 30 mg/m <sup>3</sup> | 108.9 ± 12.5         | 87.9 ± 10.0 <sup>c</sup> | 101.6 ± 12 <sup>c</sup>    | 108.1 ± 5.0              |                         |

Values were calculated as ng/mg protein. The ratios DOPAC/DA, HVA/DA, (DOPAC+HVA)/DA, and 5-HIAA/5-HT were determined and are expressed as percent of corresponding air-exposed control. Data are mean $\pm$ SE ( $n = 8$ /group with the following exceptions: <sup>c</sup> $n = 7$  due to one undetected sample in assay group; <sup>d</sup> $n = 6$  due to two undetected samples in assay group). \*Significant decrease from corresponding air-exposed control ( $P < 0.05$ ). #Significant increase from corresponding air-exposed control ( $P < 0.05$ ).

**Table 3:** Dopamine and serotonin metabolite ratios in the olfactory bulb and hippocampus

| Brain Region | Group      | Dose                 | DOPAC/DA             | HVA/DA                     | (DOPAC+HVA)/DA             | 5-HIAA/5-HT                |                           |
|--------------|------------|----------------------|----------------------|----------------------------|----------------------------|----------------------------|---------------------------|
| <b>OB</b>    | AIR 1 d    | 0                    | 100 ± 3.9            | 100 ± 4.2                  | 100 ± 4.0                  | 100 ± 12.6                 |                           |
|              | FSD 1 d    | 10 mg/m <sup>3</sup> | 103.1 ± 3.9          | 99.7 ± 3.9                 | 100.3 ± 3.9                | 102.1 ± 3.9                |                           |
|              | AIR 7 d    | 0                    | 100 ± 5.4            | 100 ± 4.9                  | 100 ± 4.7                  | 100 ± 5.3                  |                           |
|              | FSD 7 d    | 10 mg/m <sup>3</sup> | 96.6 ± 3.1           | 96.2 ± 3.1                 | 96.2 ± 2.8                 | 80.8 ± 5.8                 |                           |
|              | AIR 27 d   | 0                    | 100 ± 5.7            | 100 ± 7.1                  | 100 ± 4.8                  | 100 ± 8.6                  |                           |
|              | FSD 27 d   | 10 mg/m <sup>3</sup> | <b>84.0 ± 4.5 *</b>  | 91.0 ± 7.9                 | 88.0 ± 6.0                 | <b>138.3 ± 7.7 #</b>       |                           |
|              | AIR 1 d    | 0                    | 100 ± 6.2            | 100 ± 3.8                  | 100 ± 4.2                  | 100 ± 12.4                 |                           |
|              | FSD 1 d    | 30 mg/m <sup>3</sup> | 105.6 ± 7.9          | 93.4 ± 4.8                 | 98.2 ± 6.0                 | 88.3 ± 11.0                |                           |
|              | AIR 7 d    | 0                    | 100 ± 6.4            | 100 ± 3.7                  | 100 ± 3.6                  | 100 ± 3.6                  |                           |
|              | FSD 7 d    | 30 mg/m <sup>3</sup> | 98.7 ± 3.6           | 102.1 ± 5.0                | 100.8 ± 3.2                | 92.2 ± 4.1                 |                           |
|              | AIR 27 d   | 0                    | 100 ± 4.0            | 100 ± 4.5                  | 100 ± 3.7                  | 100 ± 7.3                  |                           |
|              | FSD 27 d   | 30 mg/m <sup>3</sup> | 91.9 ± 4.2           | 83.2 ± 4.6                 | 87.0 ± 4.0                 | 102.7 ± 9.4                |                           |
|              | <b>HIP</b> | AIR 1 d              | 0                    | 100 ± 14.3                 | 100 ± 12.6                 | 100 ± 13.7                 | 100 ± 3.5                 |
|              |            | FSD 1 d              | 10 mg/m <sup>3</sup> | 88.1 ± 7.9                 | 83.9 ± 10.2 <sup>(d)</sup> | 81.9 ± 8.8                 | 85.0 ± 6.5                |
|              |            | AIR 7 d              | 0                    | 100 ± 17.3                 | 100 ± 13.9                 | 100 ± 15.0                 | 100 ± 2.9                 |
|              |            | FSD 7 d              | 10 mg/m <sup>3</sup> | 83.9 ± 14.6 <sup>(e)</sup> | 91.3 ± 12.1 <sup>(e)</sup> | 87.6 ± 12.8 <sup>(e)</sup> | 97.9 ± 2.0 <sup>(e)</sup> |
|              |            | AIR 27 d             | 0                    | 100 ± 8.7                  | 100 ± 6.2                  | 100 ± 6.7                  | 100 ± 4.5                 |
|              |            | FSD 27 d             | 10 mg/m <sup>3</sup> | 127.3 ± 27.2               | 104.1 ± 16.6               | 119.3 ± 23.3               | 93.1 ± 5.4                |
| AIR 1 d      |            | 0                    | 100 ± 8.6            | 100 ± 9.3                  | 100 ± 7.2                  | 100 ± 3.0                  |                           |
| FSD 1 d      |            | 30 mg/m <sup>3</sup> | 114.1 ± 13.0         | 94.4 ± 7.6                 | 111.9 ± 12.3               | 97.7 ± 2.3                 |                           |
| AIR 7 d      |            | 0                    | 100 ± 9.0            | 100 ± 9.3                  | 100 ± 8.4                  | 100 ± 4.0                  |                           |
| FSD 7 d      |            | 30 mg/m <sup>3</sup> | 100.1 ± 13.8         | 99.2 ± 13.7                | 100 ± 13.6                 | 83.5 ± 7.7                 |                           |
| AIR 27 d     |            | 0                    | 100 ± 23.3           | 100 ± 12.5                 | 100 ± 19.0                 | 100 ± 9.3                  |                           |

FSD 27 d 30 mg/m<sup>3</sup> 108.9 ± 12.5 87.9 ± 10.0 <sup>(c)</sup> 101.6 ± 12.1 <sup>(c)</sup> 108.1 ± 5.0

DA, DOPAC, HVA, 5-HT and 5-HIAA were measured by HPLC-EC. Values were calculated as ng/mg protein. The ratios DOPAC/DA, HVA/DA, (DOPAC+HVA)/DA, and 5-HIAA/5-HT were determined and are expressed as percent of corresponding air-exposed control. Data are mean ± SE (n = 8/group with the following exceptions: <sup>(c)</sup> n = 7 due to one undetected sample in assay group; <sup>(d)</sup> n = 6 due to two undetected samples in assay group). \* significant decrease from corresponding air-exposed control (P < 0.05). # significant increase from corresponding air-exposed control (P < 0.05).

**Table 4.** Dopamine and serotonin metabolite ratios in the striatum and cerebellum

| <b>Brain Region</b> | <b>Group</b> | <b>Dose</b>          | <b>DOPAC/DA</b>          | <b>HVA/DA</b>          | <b>(DOPAC+HVA)/DA</b>  | <b>5-HIAA/5-HT</b> |             |
|---------------------|--------------|----------------------|--------------------------|------------------------|------------------------|--------------------|-------------|
| <b>STR</b>          | AIR 1 d      | 0                    | 100 ± 5.4                | 100 ± 4.3              | 100 ± 4.4              | 100 ± 3.0          |             |
|                     | FSD 8 1 d    | 10 mg/m <sup>3</sup> | 91.0 ± 2.9               | 94.1 ± 2.7             | 92.6 ± 2.1             | 87.2 ± 3.4         |             |
|                     | AIR 7 d      | 0                    | 100 ± 4.8                | 100 ± 3.3              | 100 ± 3.8              | 100 ± 8.2          |             |
|                     | FSD 8 7 d    | 10 mg/m <sup>3</sup> | 99.2 ± 3.2               | 96.9 ± 4.5             | 97.9 ± 3.5             | 83.7 ± 3.0         |             |
|                     | AIR 27 d     | 0                    | 100 ± 4.8                | 100 ± 5.4              | 100 ± 4.7              | 100 ± 3.7          |             |
|                     | FSD 8 27 d   | 10 mg/m <sup>3</sup> | 91.5 ± 4.4               | 96.3 ± 7.0             | 93.6 ± 5.0             | 96.0 ± 3.9         |             |
|                     | AIR 1 d      | 0                    | 100 ± 2.3                | 100 ± 3.2              | 100 ± 2.3              | 100 ± 3.4          |             |
|                     | FSD 8 1 d    | 30 mg/m <sup>3</sup> | 101.5 ± 1.6              | 97.4 ± 1.2             | 99.9 ± 1.0             | 99.9 ± 2.7         |             |
|                     | AIR 7 d      | 0                    | 100 ± 2.7                | 100 ± 4.6              | 100 ± 3.0              | 100 ± 3.7          |             |
|                     | FSD 8 7 d    | 30 mg/m <sup>3</sup> | 90.3 ± 1.3               | 89.0 ± 2.0             | 89.7 ± 1.3             | 92.7 ± 3.3         |             |
|                     | AIR 27 d     | 0                    | 100 ± 3.8                | 100 ± 5.0              | 100 ± 4.1              | 100 ± 3.5          |             |
|                     | FSD 8 27 d   | 30 mg/m <sup>3</sup> | 98.6 ± 5.1               | 89.9 ± 5.2             | 95.1 ± 4.8             | 96.4 ± 5.7         |             |
|                     | <b>CER</b>   | AIR 1 d              | 0                        | 100 ± 4.1              | 100 ± 3.9              | 100 ± 3.5          | 100 ± 3.4   |
|                     |              | FSD 8 1 d            | 10 mg/m <sup>3</sup>     | 95.0 ± 7.8             | 87.9 ± 8.2             | 91.5 ± 7.6         | 90.0 ± 7.8  |
|                     |              | AIR 7 d              | 0                        | 100 ± 5.2              | 100 ± 6.2              | 100 ± 5.0          | 100 ± 4.0   |
|                     |              | FSD 8 7 d            | 10 mg/m <sup>3</sup>     | 108.4 ± 6.2            | 106.3 ± 4.1            | 107.3 ± 4.7        | 108.6 ± 6.2 |
|                     |              | AIR 27 d             | 0                        | 100 ± 12.3             | 100 ± 13.3             | 100 ± 10.3         | 100 ± 9.6   |
|                     |              | FSD 8 27 d           | 10 mg/m <sup>3</sup>     | 100.4 ± 6.5            | 112.7 ± 10.5           | 105.2 ± 6.5        | 99.4 ± 5.5  |
| AIR 1 d             |              | 0                    | 100 ± 5.0                | 100 ± 3.7              | 100 ± 4.3              | 100 ± 4.3          |             |
| FSD 8 1 d           |              | 30 mg/m <sup>3</sup> | 100.8 ± 8.7              | 87.0 ± 4.8             | 98.6 ± 7.9             | 90.2 ± 7.8         |             |
| AIR 7 d             |              | 0                    | 100 ± 6.6 <sup>(a)</sup> | 100 ± 4.8 <sup>a</sup> | 100 ± 5.7 <sup>a</sup> | 100 ± 5.8          |             |
| FSD 8 7 d           |              | 30 mg/m <sup>3</sup> | 89.5 ± 6.9               | 94.5 ± 5.4             | 90.3 ± 6.2             | 94.1 ± 5.6         |             |
| AIR 27 d            |              | 0                    | 100 ± 11.3               | 100 ± 7.4              | 100 ± 10.5             | 100 ± 6.2          |             |
| FSD 8 27 d          |              | 30 mg/m <sup>3</sup> | 99.5 ± 4.4               | 88.9 ± 9.9             | 98.5 ± 4.5             | 88.3 ± 6.8         |             |

Values were calculated as ng/mg protein. The ratios DOPAC/DA, HVA/DA, (DOPAC+HVA)/DA, and 5-HIAA/5-HT were determined and are expressed as percent of corresponding air-exposed control. Data are mean±SE ( $n = 8$ /group with the following exception: <sup>a</sup> $n = 7$  due to one outlier sample in assay group).
